# Supplementary material for: Coinage metal(i) clusters supported by a 1,10-phenanthroline-phosphine: orange-to-NIR phosphorescence, metallophilic interactions and enhanced cytotoxicity
Source: Royal Society of Chemistry journal article supplement (doi:10.1039/d4dt02642j), 2024-01-01
Supplement: d4dt02642j1.pdf [file d4dt02642j1.pdf]

## Supporting Information

### Coinage metal(I) clusters supported by a 1,10-phenanthroline-phosphine: orange-to-NIR phosphorescence, metallophilic interactions and enhanced cytotoxicity

Alexander V. Artem'ev,<sup>\*a</sup> Maria P. Davydova,<sup>a</sup> Lyubov S. Klyushova,<sup>b</sup> Evgeniy H. Sadykov,<sup>a</sup> Mariana I. Rakhmanova,<sup>a</sup> Taisiya S. Sukhikh<sup>a</sup>

<sup>a</sup> Nikolaev Institute of Inorganic Chemistry, SB RAS, 3, Lavrentiev Ave., 630090 Novosibirsk, Russia

<sup>b</sup> Institute of Molecular Biology and Biophysics, Federal Research Center of Fundamental and Translational Medicine, Timakova Str. 2/12, 630060 Novosibirsk, Russia

\*E-mail: [chemisufarm@yandex.ru](mailto:chemisufarm@yandex.ru) (Alexander V. Artem'ev)

#### Table of content

|        |                                                                        |
|--------|------------------------------------------------------------------------|
| S2     | §1. Materials and Instrumentation                                      |
| S2–6   | §2. Single crystal X-ray crystallography                               |
| S6–12  | §3. <sup>1</sup> H and <sup>31</sup> P{ <sup>1</sup> H} NMR spectra    |
| S12–13 | §4. ESI-MS spectra                                                     |
| S14    | §5. FT-IR spectra                                                      |
| S14    | §6. TGA&DTG curves                                                     |
| S14    | §7. Details of DFT calculations                                        |
| S14–15 | §7.1. Computational methodology                                        |
| S15–16 | §7.2. AIM analysis details                                             |
| S17–22 | §7.3. Frontier molecular orbitals                                      |
| S22–26 | §7.4. Electronic absorption spectra: experimental and theoretical data |
| S27–30 | §8. Details of cytotoxic activity study                                |
| S30    | §9. References                                                         |

#### §1. Materials and Instrumentation

2-Chloro-1,10-phenanthroline (>98.0%, TCI), *n*-butyllithium (2.5 M in hexanes, Sigma-Aldrich), diphenylphosphine (98%, Sigma-Aldrich), CuI (99%, Sigma-Aldrich), AgBF<sub>4</sub> (≥ 98.0 %, Sigma-Aldrich), [Ag(MeCN)<sub>4</sub>]PF<sub>6</sub> (97%, Sigma-Aldrich), [Cu(MeCN)<sub>4</sub>]PF<sub>6</sub> (97%, Sigma-Aldrich) and [Cu(MeCN)<sub>4</sub>]BF<sub>4</sub> (97%, Sigma-Aldrich) were used as purchased. Au(tht)Cl was prepared following the known method.<sup>1</sup> THF (Vekton), MeCN (Cryochrom), MeOH (Vekton), CH<sub>2</sub>Cl<sub>2</sub> (ANT), Et<sub>2</sub>O (Cryochrom) and Me<sub>2</sub>CO (Cryochrom) prior to use were purified by common methods. Synthesis of 2-(diphenylphosphino)-1,10-phenanthroline was carried out under an argon atmosphere, while the complexes **1–5** were prepared under ambient conditions.

<sup>1</sup>H and <sup>31</sup>P {<sup>1</sup>H} NMR spectra were registered using a Bruker AV-500 spectrometer at 500.13 and 202.46 MHz, respectively, with solvent peaks as reference (for <sup>1</sup>H NMR), at room temperature. The <sup>31</sup>P {<sup>1</sup>H} NMR shifts are referenced respective to 85% H<sub>3</sub>PO<sub>4</sub>/D<sub>2</sub>O as an external standard.

The microanalyses were performed on a MICRO cube analyzer.

Thermogravimetric analysis (TGA/DTA) was carried out under argon flow at 10 °C/min<sup>-1</sup> heating rate using a NETZSCH STA 449 F1 Jupiter STA up to 600 °C in a closed Al<sub>2</sub>O<sub>3</sub> pan.

ESI-MS spectra were recorded on the Shimadzu LCMS-9030 instrument using direct injection of a MeCN solution (10<sup>-3</sup> M) of the sample.

UV-Vis absorption spectra were registered on a SF-2000 spectrophotometer (OKB Spectr) for solutions in MeCN (10<sup>-5</sup> mol·L<sup>-1</sup>, 298 K).

FT-IR spectra were recorded for pellets with KBr on a Bruker Vertex 80 spectrometer at ambient temperature.

Steady-state excitation and emission spectra were recorded at 298 K on a Fluorolog 3 spectrometer (Horiba Jobin Yvon) equipped with a cooled PC177CE-010 photon detection module and an R2658 photomultiplier. The emission decays were recorded on the same instrument. The absolute PLQYs were determined at 298 K using a Fluorolog 3 Quanta-phi integrating sphere.

## §2. Single crystal X-ray crystallography

Single crystals of **1**·4MeCN were obtained by slow evaporation of a CH<sub>3</sub>CN solution at room temperature. Single crystals of **2**·3CH<sub>2</sub>Cl<sub>2</sub> and **4**·2CH<sub>2</sub>Cl<sub>2</sub>·H<sub>2</sub>O were obtained by vapor diffusion of Et<sub>2</sub>O into CH<sub>2</sub>Cl<sub>2</sub> solutions. Single crystals of **3** and **5**·0.5Et<sub>2</sub>O were obtained by vapor diffusion of Et<sub>2</sub>O into MeCN and Me<sub>2</sub>CO solutions, respectively.

The data were collected with a Bruker D8 Venture diffractometer with a CMOS PHOTON III detector and I $\mu$ S 3.0 source (mirror optics,  $\lambda(\text{MoK}\alpha) = 0.71073 \text{ \AA}$ ). Absorption corrections were applied with the use of the SADABS program<sup>2</sup>. The structures were solved by dual space algorithm (SHELXT<sup>3</sup>) and refined by the full-matrix least squares technique (SHELXL<sup>4</sup>) in the anisotropic approximation (except hydrogen atoms). Positions of hydrogen atoms were calculated geometrically and refined in the riding model.

The crystallographic data and details of the structure refinements are summarized in **Table S1**. CCDC 2239197–2239201 contain the supplementary crystallographic data for this paper. These data can be obtained free of charge from The Cambridge Crystallographic Data Center at [http://www.ccdc.cam.ac.uk/data\\_request/cif](http://www.ccdc.cam.ac.uk/data_request/cif)

**Table S1.** X-Ray crystallographic data for **1–5**.

| Compound                                                                                                       | 1·4MeCN                                                                                        | 2·3CH <sub>2</sub> Cl <sub>2</sub>                                                                              | 3                                                                                 |
|----------------------------------------------------------------------------------------------------------------|------------------------------------------------------------------------------------------------|-----------------------------------------------------------------------------------------------------------------|-----------------------------------------------------------------------------------|
| CCDC number                                                                                                    | 2239197                                                                                        | 2239200                                                                                                         | 2239199                                                                           |
| Chemical formula                                                                                               | C <sub>104</sub> H <sub>80</sub> Cu <sub>6</sub> I <sub>6</sub> N <sub>12</sub> P <sub>4</sub> | C <sub>51</sub> H <sub>40</sub> CuAu <sub>2</sub> N <sub>4</sub> P <sub>2</sub> Cl <sub>8</sub> BF <sub>4</sub> | C <sub>48</sub> H <sub>34</sub> AuCuN <sub>4</sub> P <sub>4</sub> F <sub>12</sub> |
| <i>M<sub>r</sub></i>                                                                                           | 2764.32                                                                                        | 1598.69                                                                                                         | 1279.18                                                                           |
| Crystal system, space group                                                                                    | Triclinic, <i>P</i> -1                                                                         | Monoclinic, <i>C</i> 2/c                                                                                        | Monoclinic, <i>C</i> 2/c                                                          |
| Temperature (K)                                                                                                | 150                                                                                            | 150                                                                                                             | 150                                                                               |
| <i>a</i> , <i>b</i> , <i>c</i> (Å)                                                                             | 15.6344(11),<br>17.6663(13),<br>21.4428(14)                                                    | 11.7266(10), 30.047(2),<br>15.8840(11)                                                                          | 26.5931(14), 8.6249(5),<br>22.9847(13)                                            |
| $\alpha$ , $\beta$ , $\gamma$ (°)                                                                              | 70.318(2), 78.179(2),<br>66.302(2)                                                             | 96.046(3)                                                                                                       | 119.480(2)                                                                        |
| <i>V</i> (Å <sup>3</sup> )                                                                                     | 5089.7(6)                                                                                      | 5565.6(7)                                                                                                       | 4589.3(5)                                                                         |
| <i>Z</i>                                                                                                       | 2                                                                                              | 4                                                                                                               | 4                                                                                 |
| $\mu$ (mm <sup>-1</sup> )                                                                                      | 3.17                                                                                           | 6.13                                                                                                            | 3.89                                                                              |
| Crystal size (mm)                                                                                              | 0.17 × 0.15 × 0.07                                                                             | 0.23 × 0.13 × 0.05                                                                                              | 0.19 × 0.16 × 0.15                                                                |
| <i>T<sub>min</sub></i> , <i>T<sub>max</sub></i>                                                                | 0.613, 0.745                                                                                   | 0.502, 0.746                                                                                                    | 0.620, 0.746                                                                      |
| No. of measured, independent and observed [ <i>I</i> > 2σ( <i>I</i> )] reflections                             | 59880, 20768, 16343                                                                            | 31582, 6674, 5725                                                                                               | 28560, 5478, 5099                                                                 |
| <i>R<sub>int</sub></i>                                                                                         | 0.049                                                                                          | 0.051                                                                                                           | 0.040                                                                             |
| (sin θ/λ) <sub>max</sub> (Å <sup>-1</sup> )                                                                    | 0.626                                                                                          | 0.659                                                                                                           | 0.658                                                                             |
| <i>R</i> [ <i>F</i> <sup>2</sup> > 2σ( <i>F</i> <sup>2</sup> )], <i>wR</i> ( <i>F</i> <sup>2</sup> ), <i>S</i> | 0.044, 0.112, 1.02                                                                             | 0.042, 0.111, 1.07                                                                                              | 0.022, 0.047, 1.03                                                                |
| No. of reflections                                                                                             | 20768                                                                                          | 6674                                                                                                            | 5478                                                                              |
| No. of parameters                                                                                              | 1193                                                                                           | 309                                                                                                             | 381                                                                               |
| No. of restraints                                                                                              | 6                                                                                              | 4                                                                                                               | 316                                                                               |
| $\Delta\rho_{\max}$ , $\Delta\rho_{\min}$ (e Å <sup>-3</sup> )                                                 | 1.72, -1.63                                                                                    | 1.43, -1.80                                                                                                     | 0.39, -0.29                                                                       |

**Table S1 (continuation).** X-Ray crystallographic data for complexes **1–5**.

| Compound                                                                                                       | 4·2CH <sub>2</sub> Cl <sub>2</sub> ·H <sub>2</sub> O                                                             | 5·0.5Et <sub>2</sub> O                                                                             |
|----------------------------------------------------------------------------------------------------------------|------------------------------------------------------------------------------------------------------------------|----------------------------------------------------------------------------------------------------|
| CCDC number                                                                                                    | 2239198                                                                                                          | 2239201                                                                                            |
| Chemical formula                                                                                               | C <sub>50</sub> H <sub>40</sub> AgAu <sub>2</sub> N <sub>4</sub> OP <sub>2</sub> Cl <sub>6</sub> BF <sub>4</sub> | C <sub>74</sub> H <sub>56</sub> AgAuN <sub>6</sub> O <sub>0.5</sub> P <sub>5</sub> F <sub>12</sub> |
| <i>M<sub>r</sub></i>                                                                                           | 1576.11                                                                                                          | 1724.89                                                                                            |
| Crystal system, space group                                                                                    | Monoclinic, <i>C2/c</i>                                                                                          | Trigonal, <i>P</i> -3                                                                              |
| Temperature (K)                                                                                                | 150                                                                                                              | 150                                                                                                |
| <i>a</i> , <i>b</i> , <i>c</i> (Å)                                                                             | 12.1888(8), 30.073(3),<br>15.7516(11)                                                                            | 15.4928(6), 34.400(3)                                                                              |
| α, β, γ (°)                                                                                                    | 97.452(2)                                                                                                        | –                                                                                                  |
| <i>V</i> (Å <sup>3</sup> )                                                                                     | 5725.1(7)                                                                                                        | 7150.7(8)                                                                                          |
| <i>Z</i>                                                                                                       | 4                                                                                                                | 4                                                                                                  |
| μ (mm <sup>-1</sup> )                                                                                          | 5.84                                                                                                             | 2.51                                                                                               |
| Crystal size (mm)                                                                                              | 0.2 × 0.15 × 0.08                                                                                                | 0.27 × 0.22 × 0.15                                                                                 |
| <i>T<sub>min</sub></i> , <i>T<sub>max</sub></i>                                                                | 0.540, 0.745                                                                                                     | 0.669, 0.746                                                                                       |
| No. of measured, independent and observed [ <i>I</i> > 2σ( <i>I</i> )] reflections                             | 29579, 5468, 4724                                                                                                | 40745, 9780, 8570                                                                                  |
| <i>R<sub>int</sub></i>                                                                                         | 0.096                                                                                                            | 0.036                                                                                              |
| (sin θ/λ) <sub>max</sub> (Å <sup>-1</sup> )                                                                    | 0.612                                                                                                            | 0.625                                                                                              |
| <i>R</i> [ <i>F</i> <sup>2</sup> > 2σ( <i>F</i> <sup>2</sup> )], <i>wR</i> ( <i>F</i> <sup>2</sup> ), <i>S</i> | 0.060, 0.153, 1.12                                                                                               | 0.053, 0.139, 1.08                                                                                 |
| No. of reflections                                                                                             | 5468                                                                                                             | 9780                                                                                               |
| No. of parameters                                                                                              | 304                                                                                                              | 591                                                                                                |
| No. of restraints                                                                                              | 25                                                                                                               | 3                                                                                                  |
| Δρ <sub>max</sub> , Δρ <sub>min</sub> (e Å <sup>-3</sup> )                                                     | 2.02, -1.17                                                                                                      | 4.02, -2.46                                                                                        |

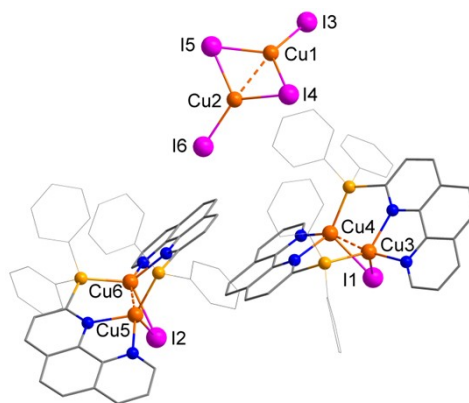

**Figure S1.** Molecular structure of 1·4MeCN determined by sc-XRD analysis (the H atoms and solvent molecules are omitted). Selected bond lengths (Å) and angles (°): Cu1···Cu2 2.6235(10), Cu3···Cu4 2.8373(8), Cu5···Cu6 2.8387(8), I3–Cu1 2.5911(9), I6–Cu2 2.4833(14), I4–Cu2 2.5692(11), I5–Cu1 2.5753(9), I2–Cu6 2.6495(7), I5–Cu2 2.5857(11), I2–Cu5 2.6522(7), I1–Cu4 2.6629(7), I1–Cu3 2.6281(7); Cu2–I4–Cu1 61.11(3), I6–Cu2–I4 116.49(11), I6–Cu2–I5 130.29(11), I5–Cu1–I4 112.25(3), Cu6–I2–Cu5 64.71(2), Cu3–I1–Cu4 64.889(19).

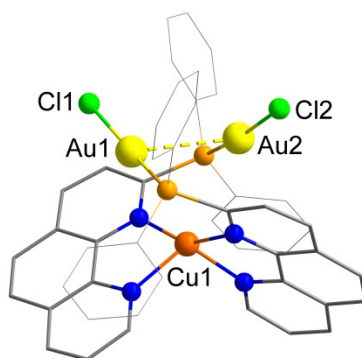

**Figure S2.** Molecular structure of  $2 \cdot 3\text{CH}_2\text{Cl}_2$  determined by *sc*-XRD analysis (the H atoms,  $\text{BF}_4^-$  counterions and solvent molecules are omitted). Selected bond lengths (Å) and angles ( $^\circ$ ): Au1 $\cdots$ Au2 3.4919(5), Au1–P1 2.2195(15), Au1–Cl1 2.2873(15); Cl1–Au1 $\cdots$ Au2 92.99(4), P1–Au1–Cl1 169.94(6), P1–Au1 $\cdots$ Au2 93.41(4).

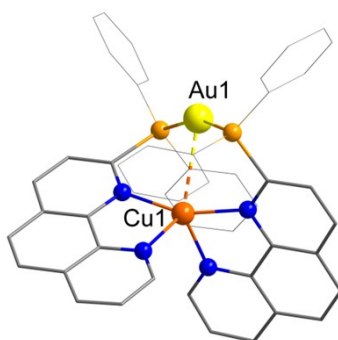

**Figure S3.** Molecular structure of **3** determined by *sc*-XRD analysis (the H atoms,  $\text{PF}_6^-$  counterions are omitted). Selected bond lengths (Å) and angles ( $^\circ$ ): Au1 $\cdots$ Cu1 2.8690(4), Au1–P1 2.3020(6), Au1–P2 2.3019(5); P2–Au1 $\cdots$ Cu1 80.290(14), P2–Au1–P1 160.58(3); P1–Au1 $\cdots$ Cu1 80.291(14).

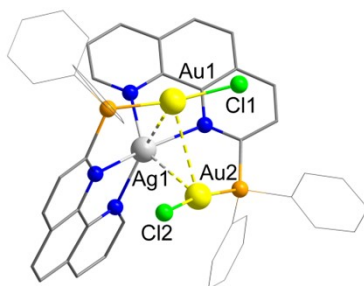

**Figure S4.** Molecular structure of  $4 \cdot 2\text{CH}_2\text{Cl}_2 \cdot \text{H}_2\text{O}$  determined by *sc*-XRD analysis (the H atoms,  $\text{BF}_4^-$  counterions and solvent molecules are omitted). Selected bond lengths (Å) and angles ( $^\circ$ ): Au1 $\cdots$ Au2 3.3059(8), Au1 $\cdots$ Ag1 3.1030(11), Au1–P1 2.233(3), Au1–Cl1 2.289(3); Ag1 $\cdots$ Au1 $\cdots$ Au2 57.813(15), P1–Au1 $\cdots$ Ag1 79.58(7), Cl1–Au1 $\cdots$ Au2 88.63(7), P1–Au1–Cl1 168.70(10), Cl1–Au1 $\cdots$ Ag1 111.37(8), Au2 $\cdots$ Ag1 $\cdots$ Au1 64.37(3), P1–Au1 $\cdots$ Au2 100.03(7).

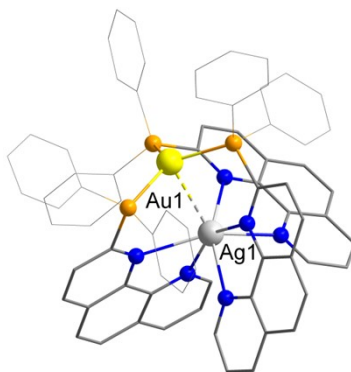

**Figure S5.** Molecular structure of  $5 \cdot 0.5\text{Et}_2\text{O}$  determined by sc-XRD analysis (the H atoms,  $\text{PF}_6^-$  counterions and solvent molecules are omitted). Selected bond lengths (Å) and angles ( $^\circ$ ): Au1 $\cdots$ Ag1 2.9294(12), Au1–P1 2.3575(18), Au1–P2 2.3575(19), Au1–P3 2.3576(18); P2–Au1 $\cdots$ Ag1 88.82(5), P3–Au1 $\cdots$ Ag1 88.82(5), P1–Au1 $\cdots$ Ag1 88.82(5), P1–Au1–P3 119.957(4); P2–Au1–P3 9.956(4).

### §3. $^1\text{H}$ and $^{31}\text{P}\{^1\text{H}\}$ NMR spectra

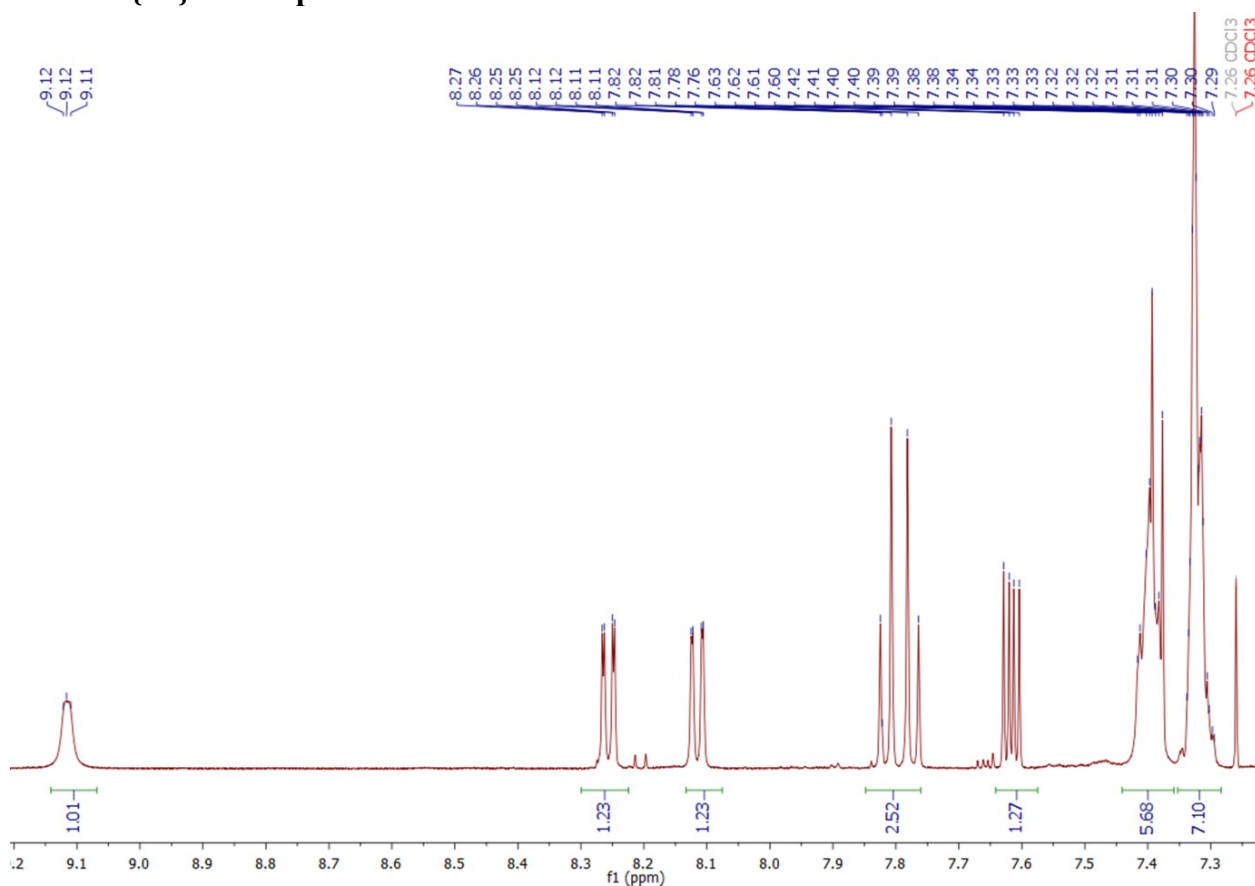

**Figure S6.**  $^1\text{H}$  NMR spectrum of **L** ( $\text{CDCl}_3$ ), selected range.

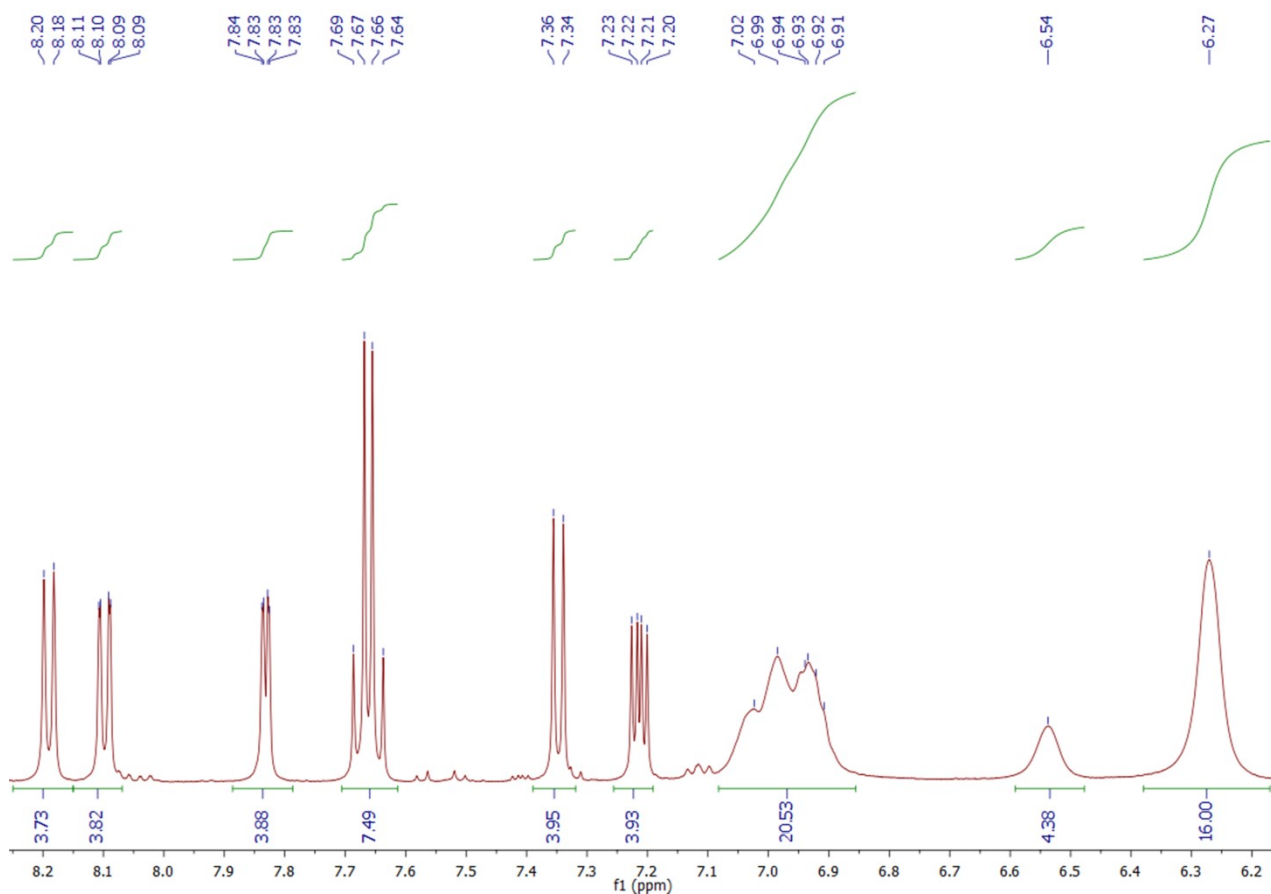

Figure S7.  $^1\text{H}$  NMR spectrum of **1** ( $\text{DMSO}-d_6$ ), selected range.

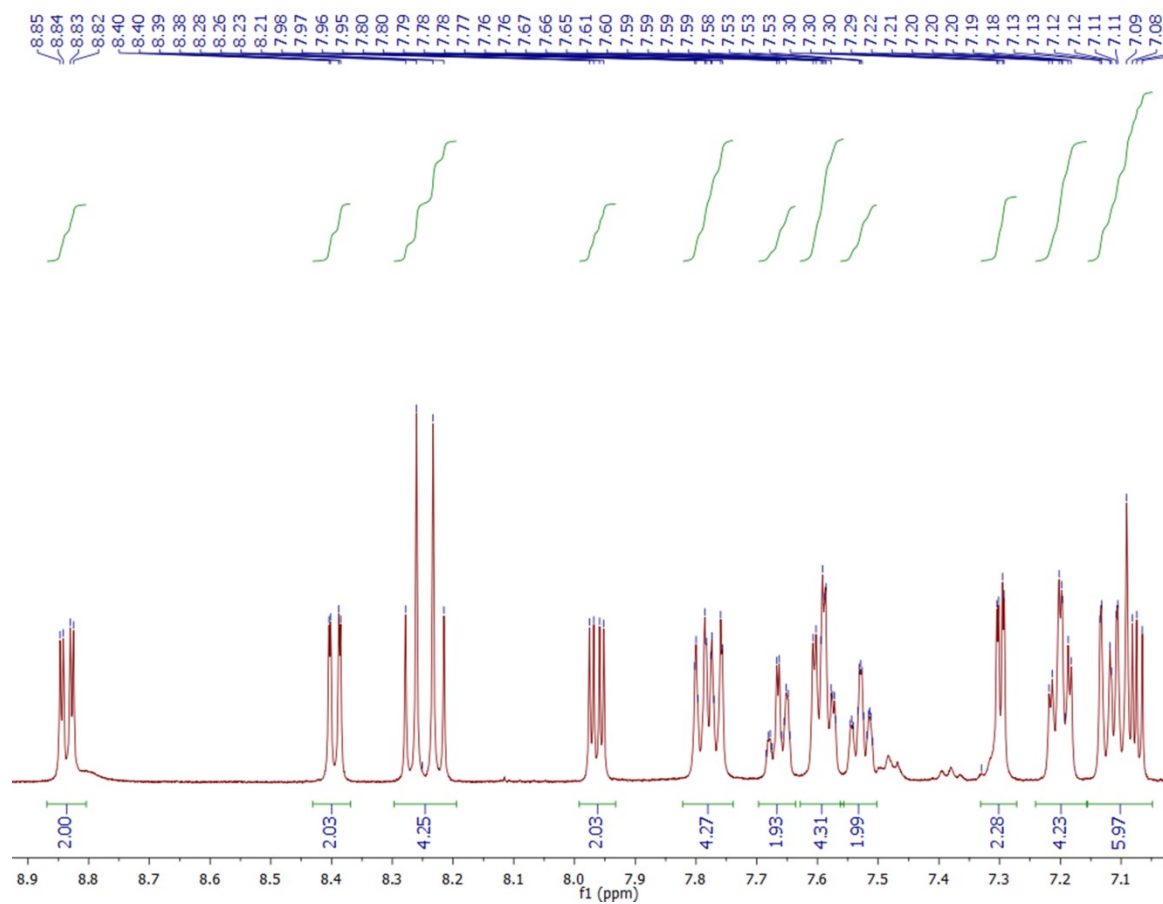

Figure S8.  $^1\text{H}$  NMR spectrum of **2** ( $\text{CD}_3\text{CN}$ ), selected range.

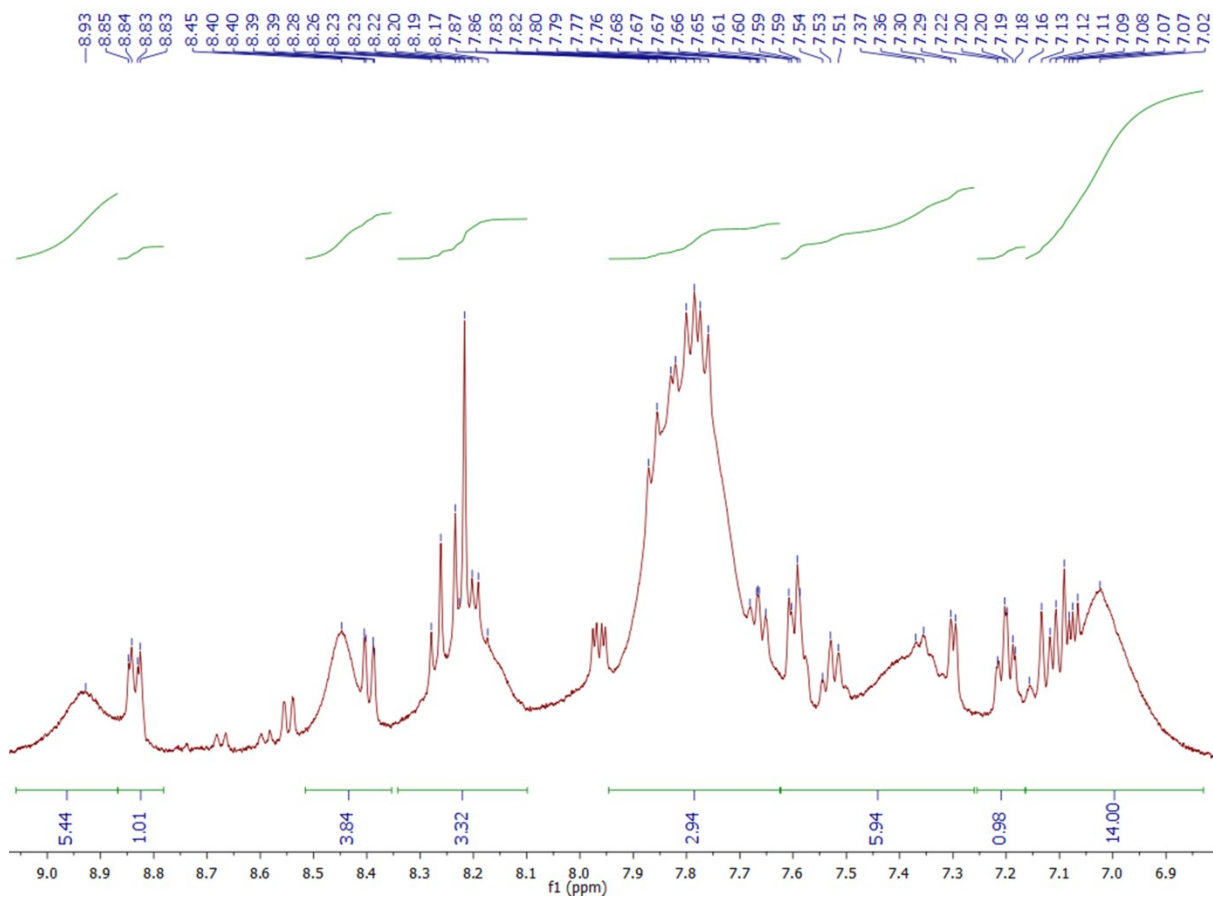

**Figure S9.**  $^1\text{H}$  NMR spectrum of **3** ( $\text{CD}_3\text{CN}$ ), selected range.

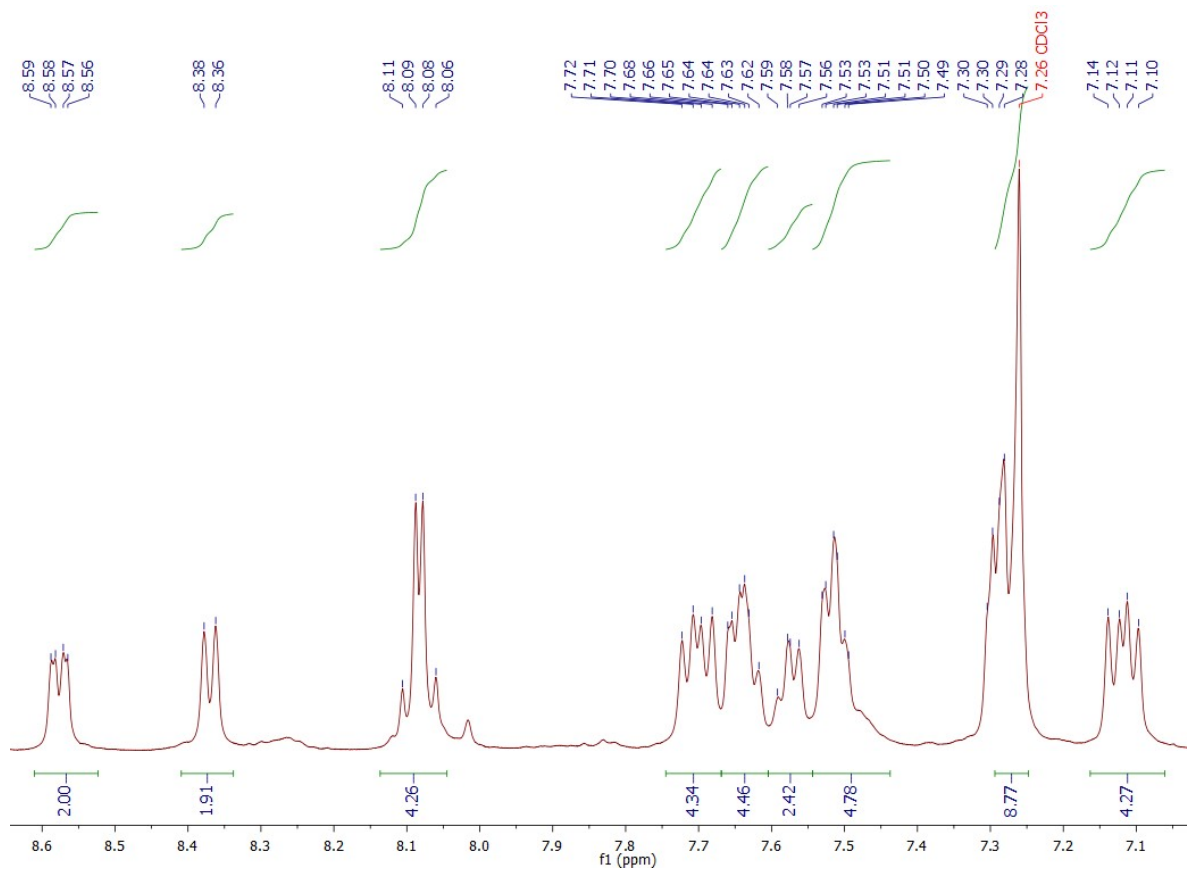

**Figure S10.**  $^1\text{H}$  NMR spectrum of **4** ( $\text{CDCl}_3$ ), selected range.



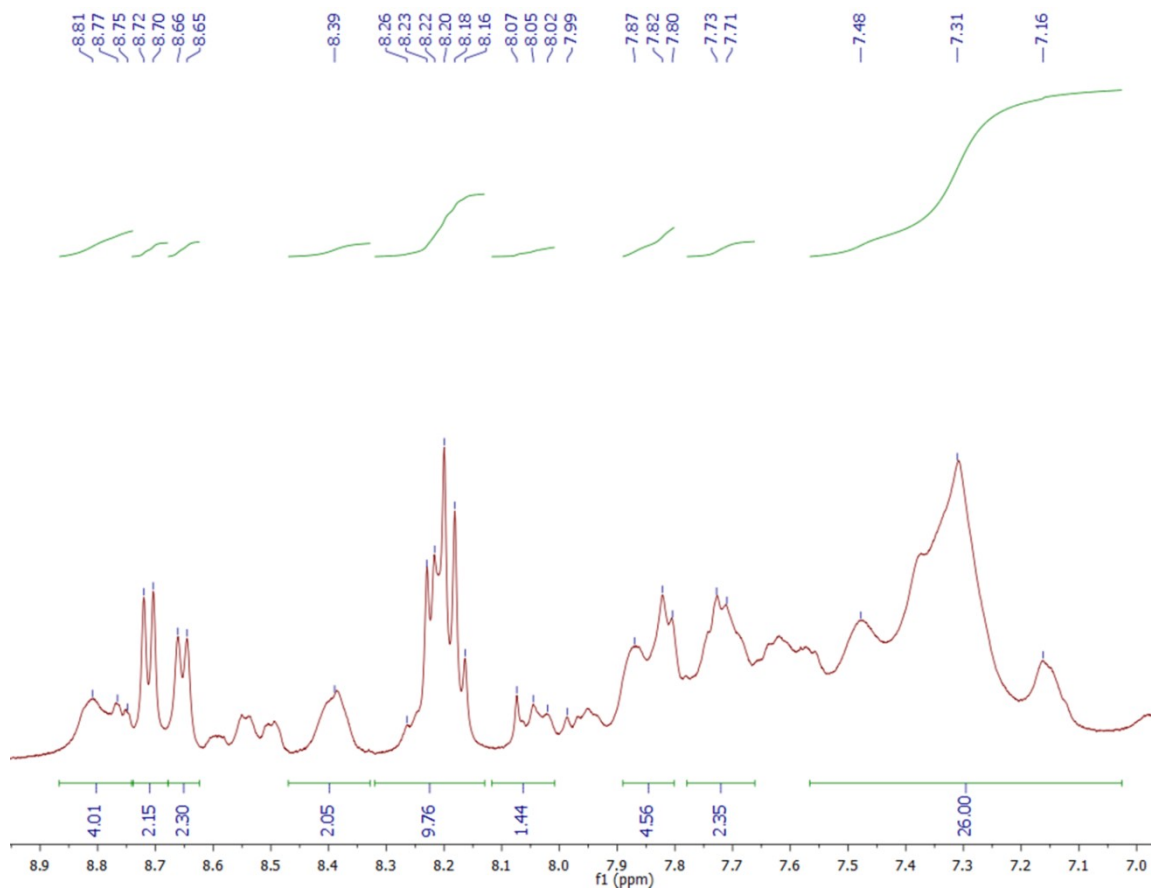

**Figure S11.**  $^1\text{H}$  NMR spectrum of **5** ( $\text{CD}_3\text{CN}$ ), selected range.

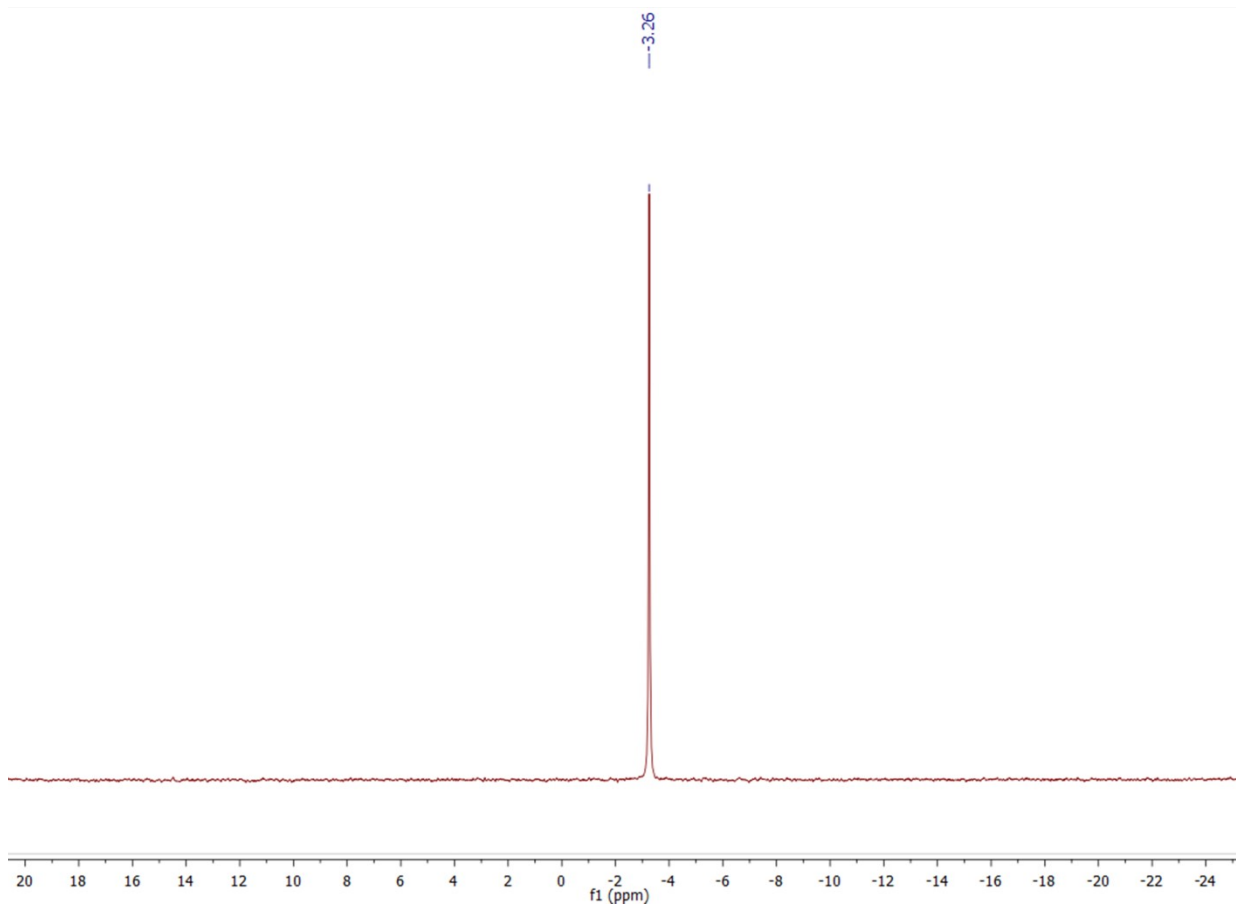

**Figure S12.**  $^{31}\text{P}\{^1\text{H}\}$  NMR spectrum of **L** ( $\text{CDCl}_3$ ), selected range.

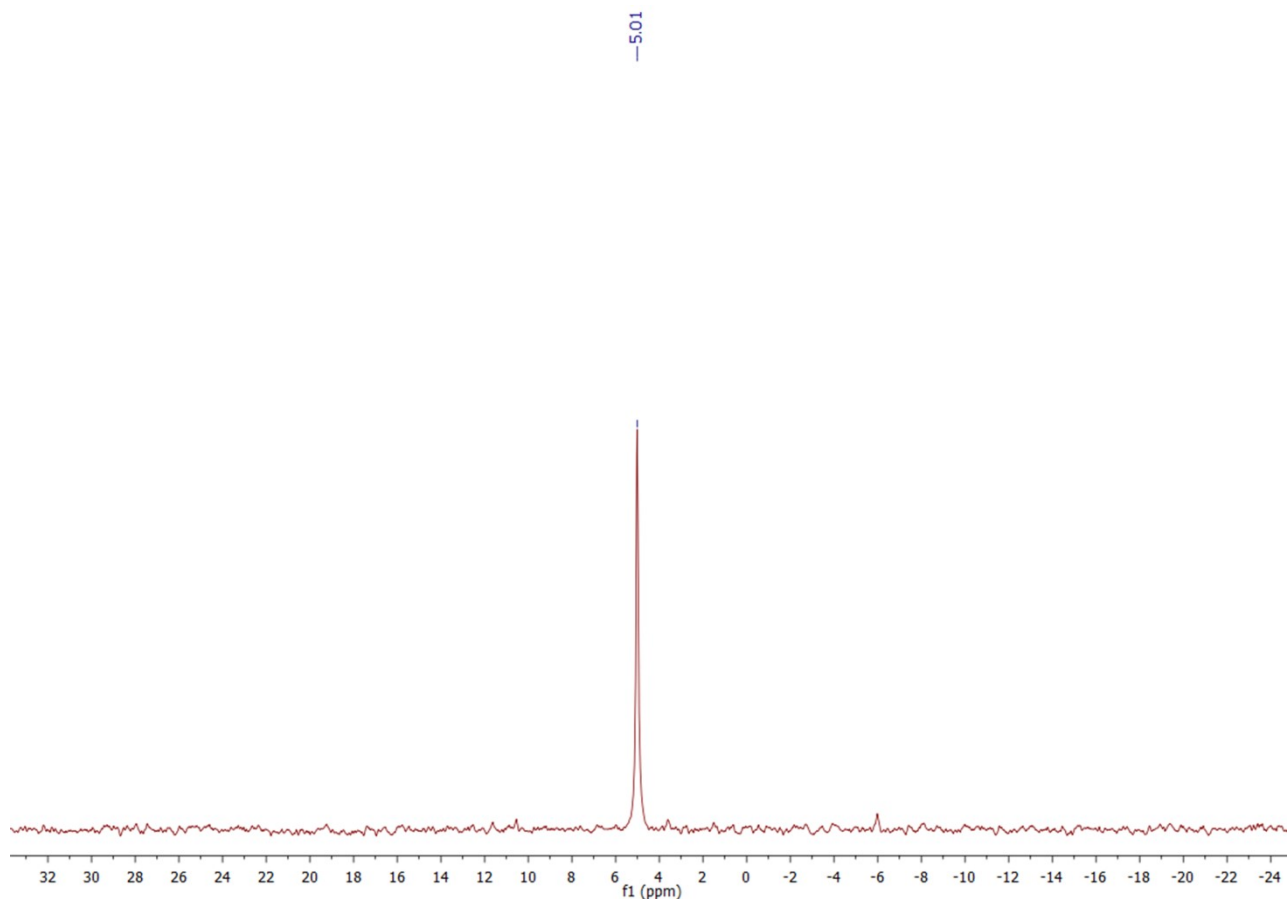

**Figure S13.**  $^{31}\text{P}\{^1\text{H}\}$  NMR spectrum of **1** ( $\text{DMSO-}d_6$ ), selected range.

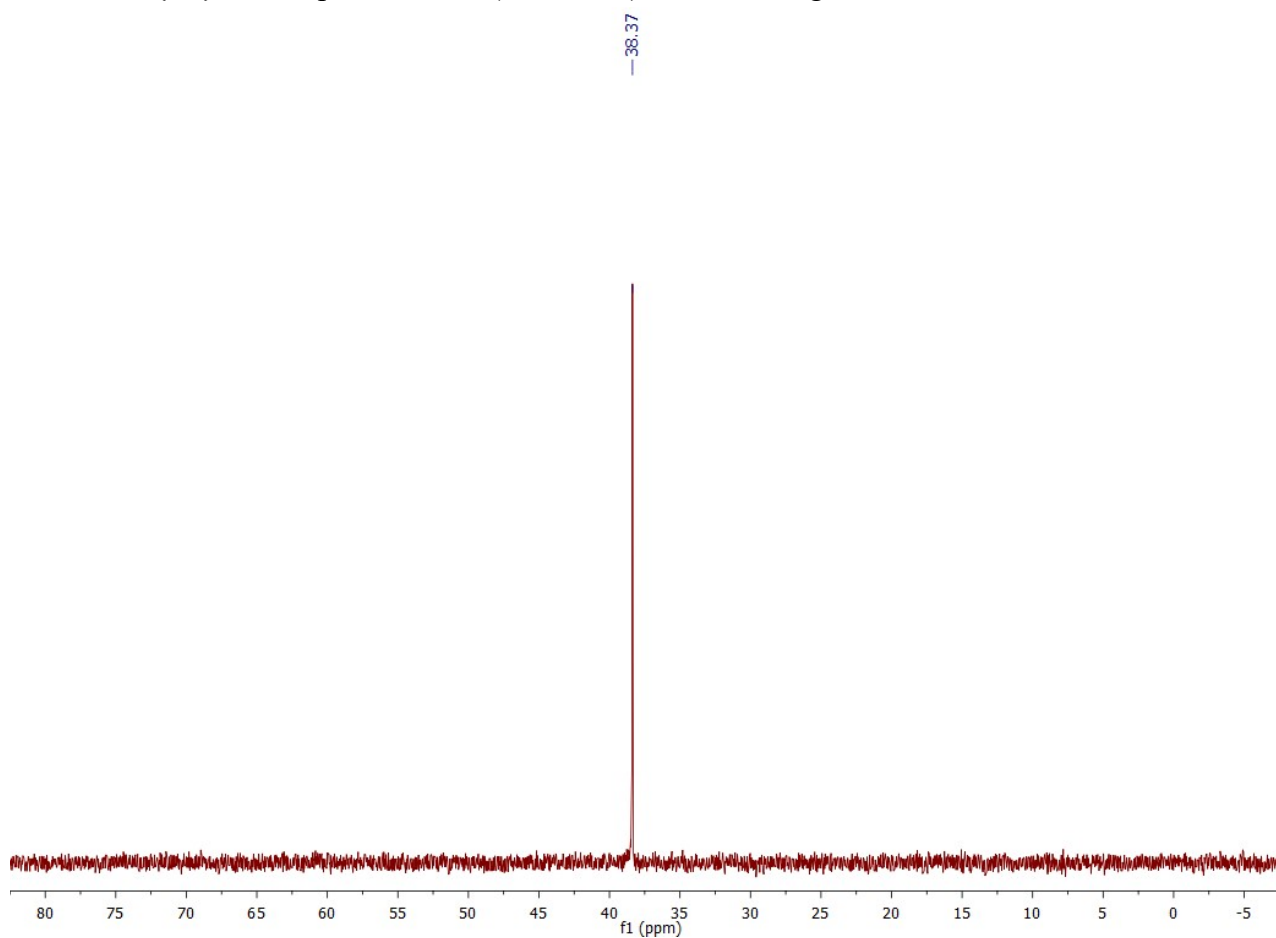

**Figure S14.**  $^{31}\text{P}\{^1\text{H}\}$  NMR spectrum of **2** ( $\text{CD}_3\text{CN}$ ), selected range.

— 36.00

~ 134.15  
~ 137.64  
~ 141.13  
~ 144.62  
~ 148.11  
~ 151.60  
~ 155.25

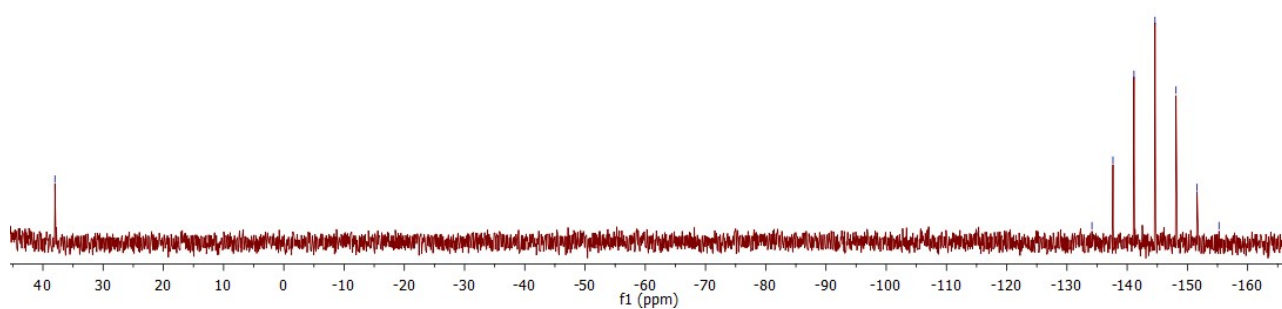

**Figure S15.**  $^{31}\text{P}\{^1\text{H}\}$  NMR spectrum of **3** ( $\text{CDCl}_3$ ), selected range.

— 42.08

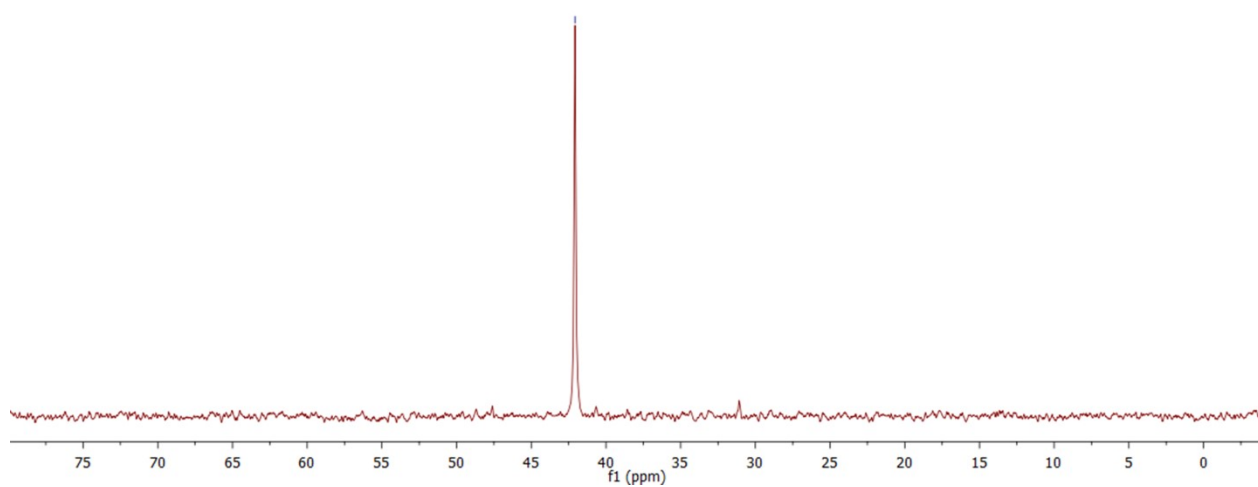

**Figure S16.**  $^{31}\text{P}\{^1\text{H}\}$  NMR spectrum of **4** ( $\text{CDCl}_3$ ), selected range.

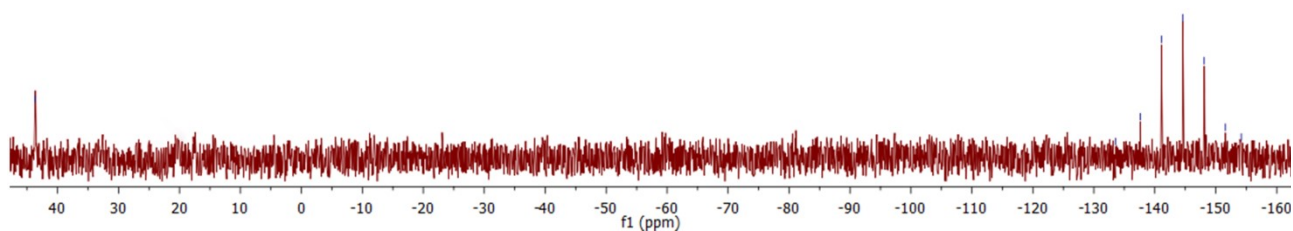

Figure S17.  $^{31}\text{P}\{^1\text{H}\}$  NMR spectrum of **5** ( $\text{CD}_3\text{CN}$ ), selected range.

#### §4. ESI-MS spectra

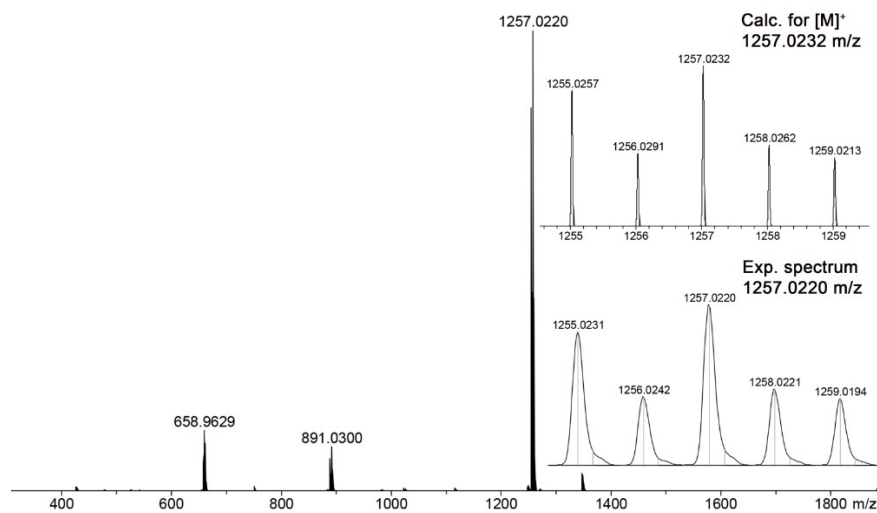

Figure S18. Experimental and calculated  $\text{ESI}^+$  mass spectra of **2**.

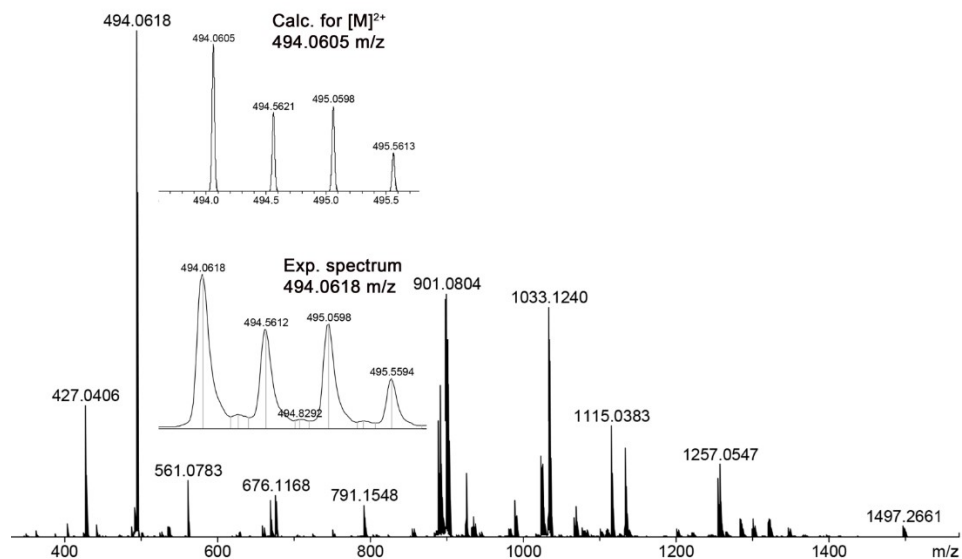

Figure S19. Experimental and calculated ESI<sup>+</sup> mass spectra of **3**.

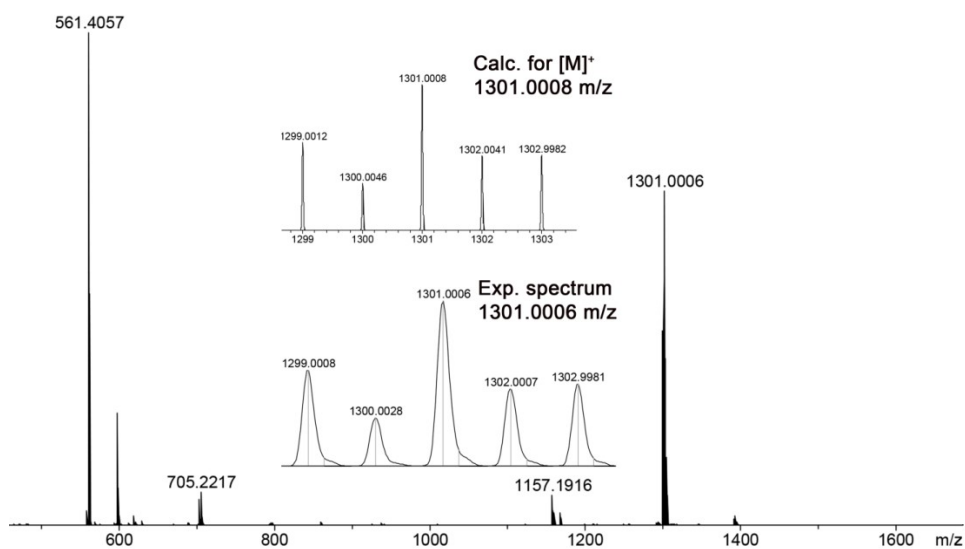

Figure S20. Experimental and calculated ESI<sup>+</sup> mass spectra of **4**.

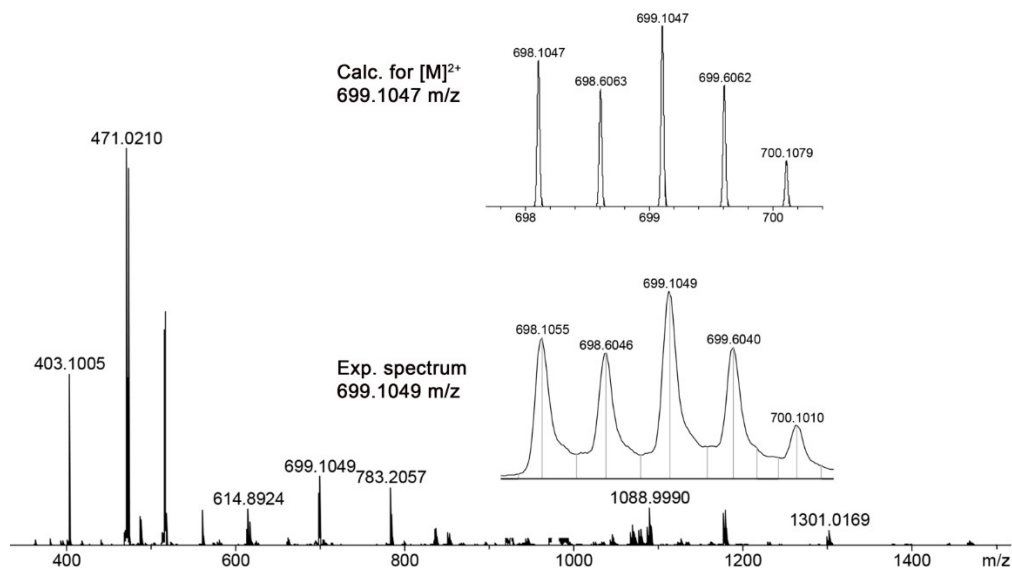

Figure S21. Experimental and calculated ESI<sup>+</sup> mass spectra of **5**.

## §5. FT-IR spectra

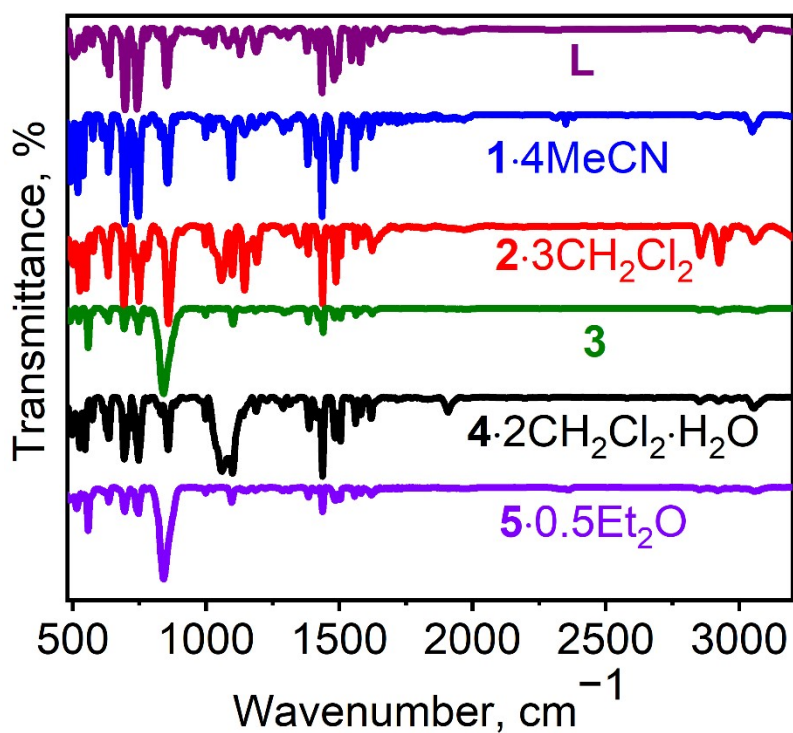

Figure S22. FT-IR spectra of L and complexes 1–5 (KBr).

## §6. TGA&DTG curves

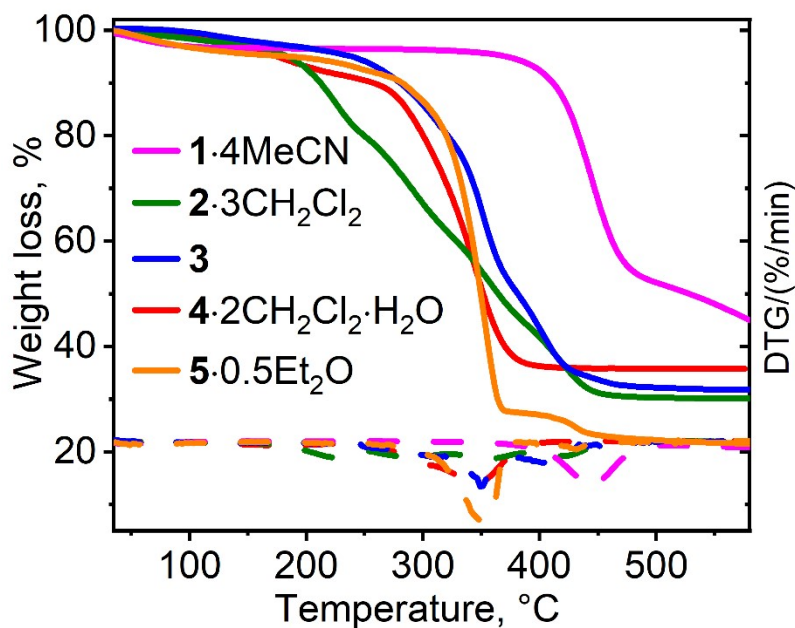

Figure S23. TGA (solid line) and DTG (dashed line) curves for complexes 1–5.

## §7. Details of DFT calculations

### §7.1. Computational methodology

Starting molecular structural coordinates were obtained using the X-ray crystal structures of complexes 1–5. The  $S_0$  geometries of complexes 1–5 were optimized at the B3LYP-D4/ZORA-def2-TZVP (with segmented

all-electron relativistically contracted basis set SARC-ZORA-TZVP<sup>5</sup> for Ag, Au and I) level with relativistic corrections using the Zero-Order Regular Approximation (ZORA)<sup>6,7</sup> in a gas phase. The lowest triplet excited states ( $T_1$ ) of cations **1–5** have been optimized at U-B3LYP-D4/ZORA-def2-TZVP level. To speed up the DFT calculations the SARC/J auxiliary basis set was applied for the RI-J approximation.

The method of quantum theory of atoms in molecules (QTAIM) was used to analyze the electronic structure of the studied complexes, more specifically the nature and energy of the metallophilic interactions M–M (M = Cu, Ag and Au). The QTAIM<sup>8</sup> topological descriptors at the bond critical points (BCPs) were calculated using the Multiwfn program (version 3.8)<sup>9</sup> and the results of all-electron calculations using the scalar relativistic the Zero-Order Regular Approximation (ZORA) and the B3LYP<sup>10</sup> functional with D4 dispersion correction.<sup>11</sup> These calculations were performed for the optimized geometries (B3LYP-D4/ZORA-def2-TZVP, see above) of complexes **1–5** using the SARC-ZORA-TZVP for Ag, Au and I and the ZORA-def2-TZVP basis set for all other atoms.

Positions of the maxima and oscillator strengths of electronic transitions in the electronic absorption spectra (EAS) of complexes **1–5** were calculated using out all-electron TD-DFT calculations including spin-orbital coupling (SOC-TD-DFT) with the scalar relativistic the Zero-Order Regular Approximation (ZORA) and range-separated hybrid CAM-B3LYP functional<sup>12</sup> and SARC-ZORA-TZVP for Cu, Ag, Au and I and the ZORA-def2-TZVP basis sets<sup>13,14</sup> for all other atoms. The Tamm-Dankoff approximation (TDA)<sup>15</sup> was not used in these calculations. The solvent effect of CH<sub>3</sub>CN was evaluated using the conductor-like solvation model CPCM.<sup>16</sup> The corresponding optimized geometries (B3LYP-D4 ZORA/def2-TZVP) of the complexes were used in the calculations related to the EAS and photophysical properties in solid state.

The ORCA 5.0.3 software package<sup>14</sup> was used for all calculations. MOs were visualized in Chemcraft.

## §7.2. AIM analysis details

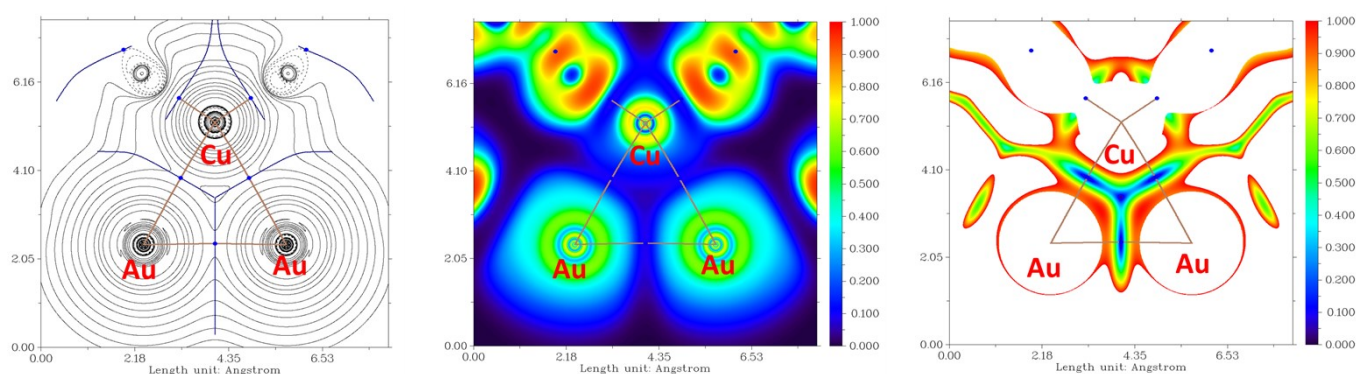

**Figure S24.** Contour line diagram of the Laplacian of electron density distribution  $\nabla^2\rho(\mathbf{r})$ , bond paths, and selected zero-flux surfaces (left), visualization of electron localization function (ELF, center) and reduced density gradient (RDG, right) analyses for metallophilic interactions **Au...Au** and **Cu...Au** in the  $[\text{Au}_2\text{CuL}_2\text{Cl}_2]^+$  cation of **2**. Bond critical points (3, -1) are shown in blue, nuclear critical points (3, -3) – in pale brown, ring critical points (3, +1) – in orange, bond paths are shown as pale brown lines, length units – Å, and the color scale for the ELF and RDG maps are presented in a.u. (B3LYP-D4/ZORA-def2-TZVP).

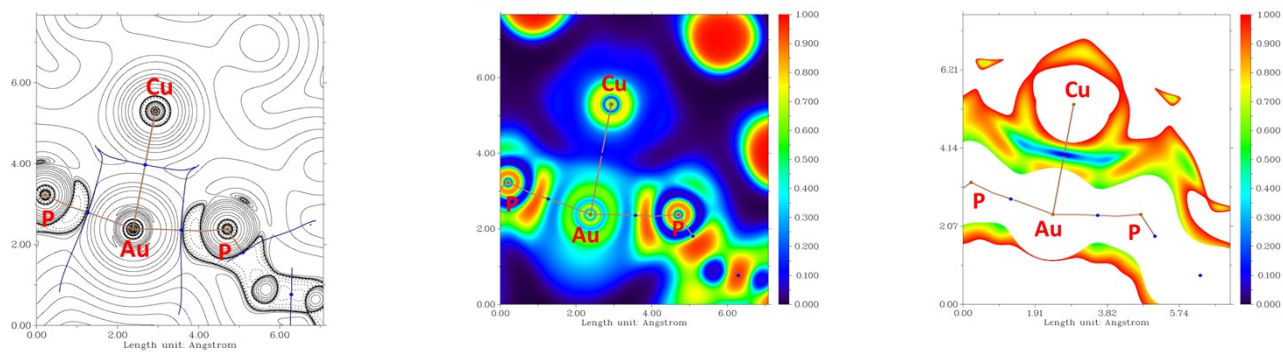

**Figure S25.** Contour line diagram of the Laplacian of electron density distribution  $\nabla^2\rho(\mathbf{r})$ , bond paths, and selected zero-flux surfaces (left), visualization of electron localization function (ELF, center) and reduced density gradient (RDG, right) analyses for metallophilic interactions and  $\text{Cu}\cdots\text{Au}$  in the  $[\text{CuAuL}_2]^{2+}$  cation of **3**. Bond critical points (3, -1) are shown in blue, nuclear critical points (3, -3) – in pale brown, ring critical points (3, +1) – in orange, bond paths are shown as pale brown lines, length units – Å, and the color scale for the ELF and RDG maps are presented in a.u. (B3LYP-D4/ZORA-def2-TZVP).

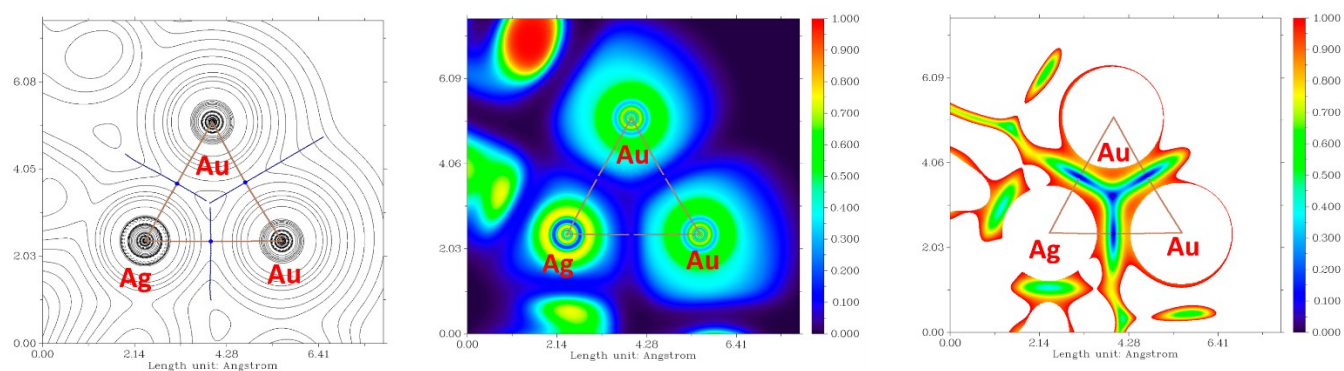

**Figure S26.** Contour line diagram of the Laplacian of electron density distribution  $\nabla^2\rho(\mathbf{r})$ , bond paths, and selected zero-flux surfaces (left), visualization of electron localization function (ELF, center) and reduced density gradient (RDG, right) analyses for metallophilic interactions  $\text{Au}\cdots\text{Au}$  and  $\text{Ag}\cdots\text{Au}$  in the  $[\text{Au}_2\text{AgL}_2\text{Cl}_2]^+$  cation of **4**. Bond critical points (3, -1) are shown in blue, nuclear critical points (3, -3) – in pale brown, ring critical points (3, +1) – in orange, bond paths are shown as pale brown lines, length units – Å, and the color scale for the ELF and RDG maps are presented in a.u. (B3LYP-D4/ZORA-def2-TZVP).

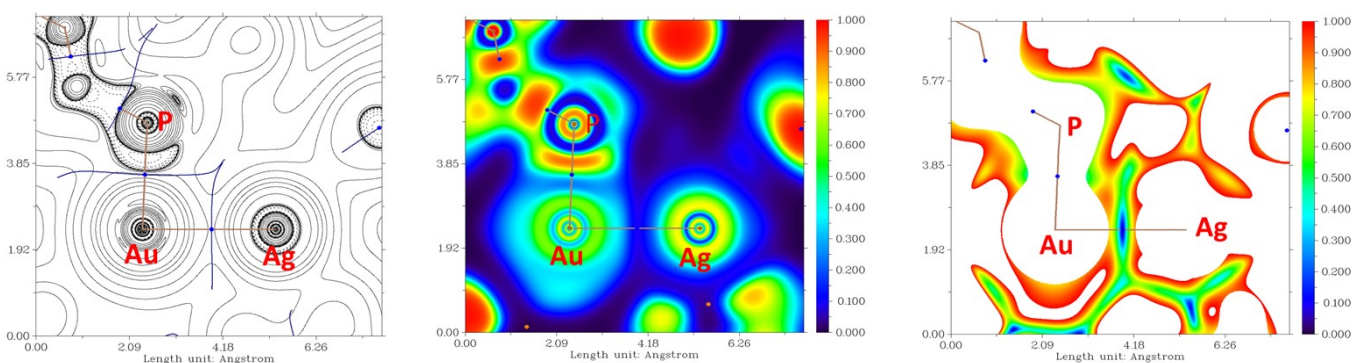

**Figure S27.** Contour line diagram of the Laplacian of electron density distribution  $\nabla^2\rho(\mathbf{r})$ , bond paths, and selected zero-flux surfaces (left), visualization of electron localization function (ELF, center) and reduced density gradient (RDG, right) analyses for metallophilic interactions  $\text{Ag}\cdots\text{Au}$  in the  $[\text{AuAgL}_3]^{2+}$  cation of **5**. Bond critical points (3, -1) are shown in blue, nuclear critical points (3, -3) – in pale brown, ring critical points (3, +1) – in orange, bond paths are shown as pale brown lines, length units – Å, and the color scale for the ELF and RDG maps are presented in a.u. (B3LYP-D4/ZORA-def2-TZVP).



### §7.3. Frontier molecular orbitals

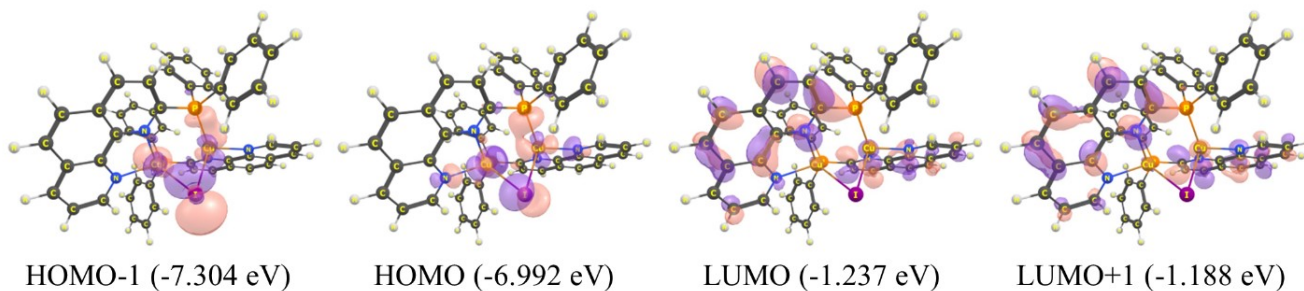

**Figure S28.** Selected frontier molecular orbitals (isovalue = 0.035) calculated for the optimized  $S_0$  state geometry of  $[\text{Cu}_2\text{L}_2(\mu_2\text{-I})]^{2+}$  cation of **1** at CAM-B3LYP/ZORA-def2-TZVP//B3LYP-D4/ZORA-def2-TZVP level.

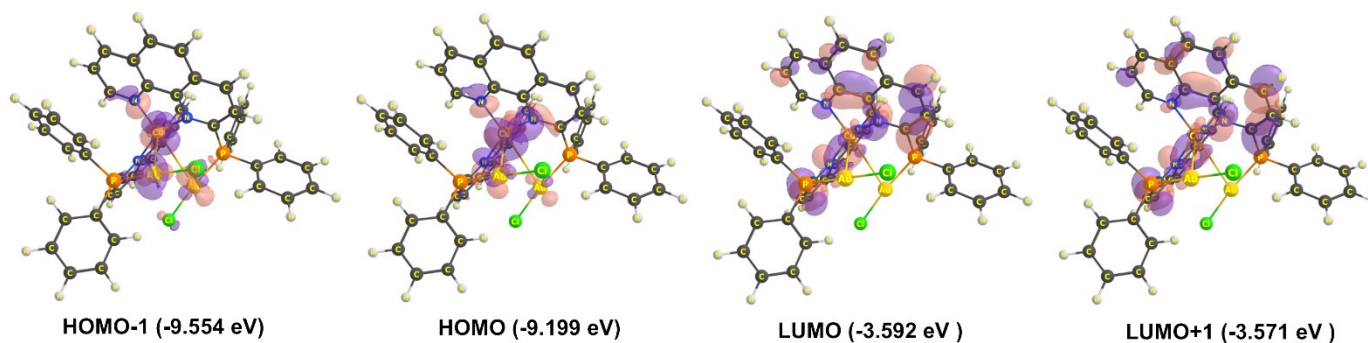

**Figure S29.** Selected frontier molecular orbitals (isovalue = 0.035) calculated for the optimized  $S_0$  state geometry  $[\text{Au}_2\text{CuL}_2\text{Cl}_2]^+$  cation of **2** at CAM-B3LYP/ZORA-def2-TZVP//B3LYP-D4/ZORA-def2-TZVP level.

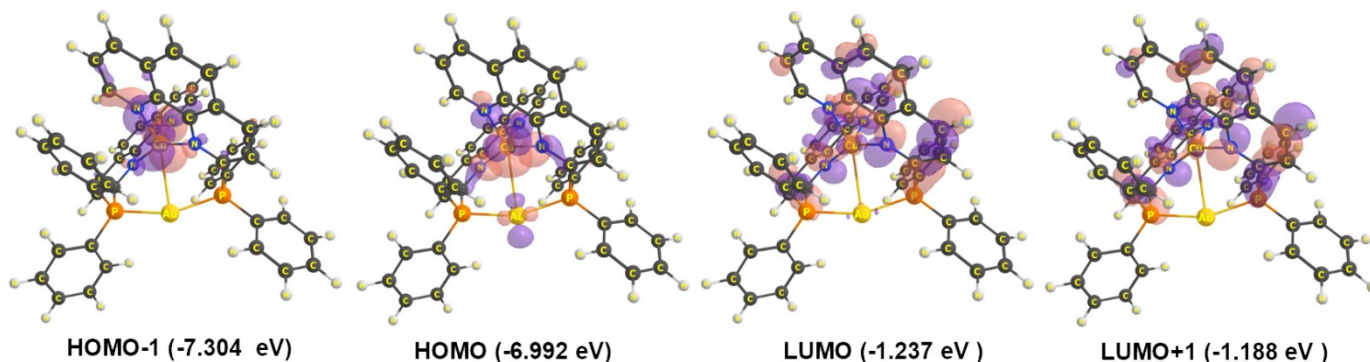

**Figure S30.** Selected frontier molecular orbitals (isovalue = 0.035) calculated for the optimized  $S_0$  state geometry of  $[\text{CuAuL}_2]^{2+}$  cation of **3** at CAM-B3LYP/ZORA-def2-TZVP//B3LYP-D4/ZORA-def2-TZVP level.

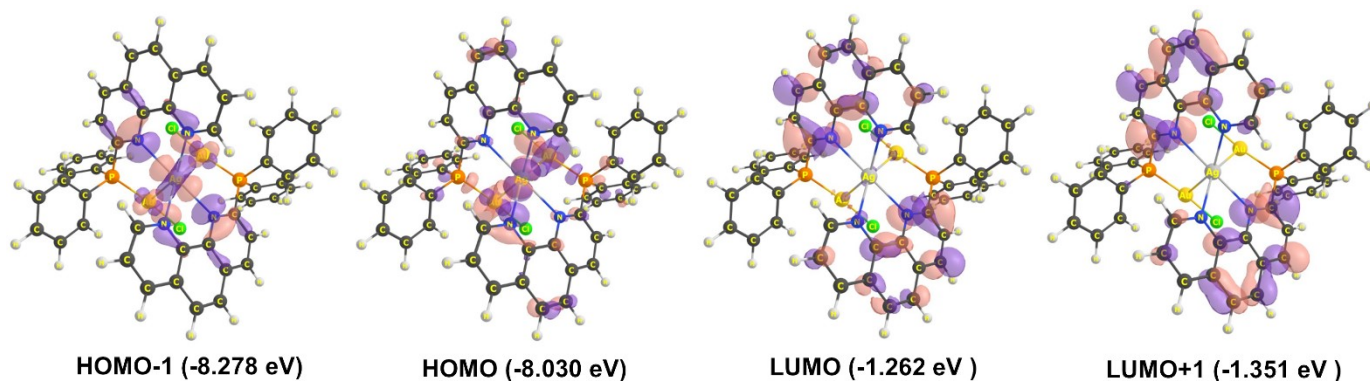

**Figure S31.** Selected frontier molecular orbitals (isovalue = 0.035) calculated for the optimized  $S_0$  state geometry of  $[\text{Au}_2\text{AgL}_2\text{Cl}_2]^+$  cation of **4** at CAM-B3LYP/ZORA-def2-TZVP//B3LYP-D4/ZORA-def2-TZVP.

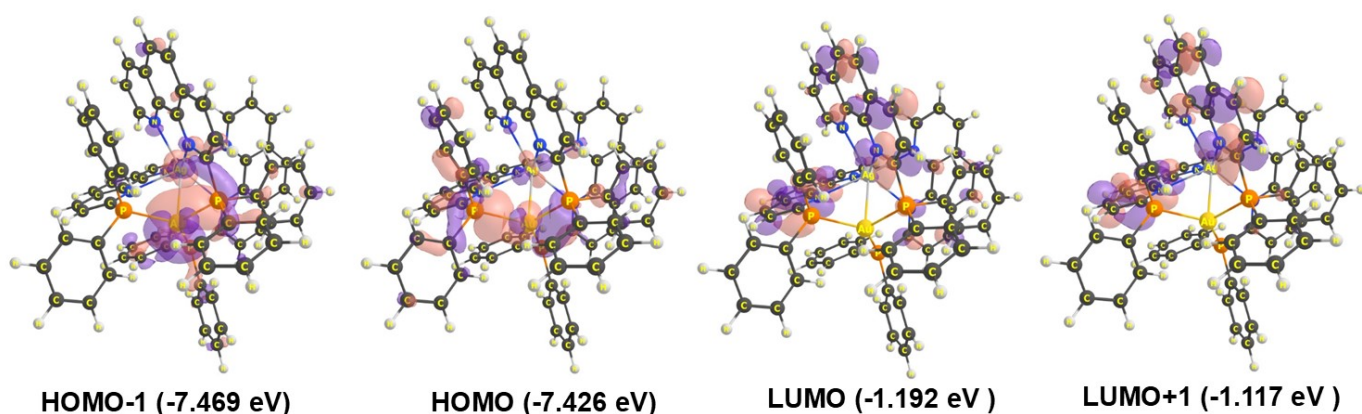

**Figure S32.** Selected frontier molecular orbitals (isovalue = 0.035) calculated for the optimized  $S_0$  state geometry of  $[\text{AuAgL}_3]^{2+}$  cation of **5** at CAM-B3LYP/ZORA-def2-TZVP//B3LYP-D4/ZORA-def2-TZVP level.

**Table S2.** Atomic contributions to selected molecular orbitals of cation  $[\text{Cu}_2\text{L}_2(\mu_2\text{-I})]^{2+}$  of **1** in the ground state ( $S_0$ ) geometry according Hirshfeld population analysis at CAM-B3LYP/ZORA-def2-TZVP//B3LYP-D4/ZORA-def2-TZVP level.

| MO      | Energy, eV | Contribution, % |       |                           |
|---------|------------|-----------------|-------|---------------------------|
|         |            | Cu              | I     | 2-(Ph <sub>2</sub> P)Phen |
| LUMO+10 | 0.42532    | 1.40            | 2.09  | 96.51                     |
| LUMO+9  | 0.26749    | 3.81            | 5.48  | 90.71                     |
| LUMO+8  | 0.18694    | 1.52            | 0.35  | 98.13                     |
| LUMO+7  | 0.14204    | 1.11            | 0.09  | 98.8                      |
| LUMO+6  | -0.00490   | 2.23            | 1.22  | 96.55                     |
| LUMO+5  | -0.05034   | 2.03            | 1.21  | 96.76                     |
| LUMO+4  | -0.07946   | 4.64            | 0.38  | 94.98                     |
| LUMO+3  | -1.09554   | 1.02            | 0.24  | 98.74                     |
| LUMO+2  | -1.12003   | 1.45            | 0.64  | 97.91                     |
| LUMO+1  | -1.18779   | 1.37            | 0.52  | 98.11                     |
| LUMO    | -1.23704   | 1.76            | 0.52  | 97.72                     |
| HOMO    | -6.99202   | 53.02           | 11.06 | 35.92                     |
| HOMO-1  | -7.30414   | 42.14           | 30.56 | 27.3                      |
| HOMO-2  | -7.35747   | 46.03           | 32.86 | 21.11                     |
| HOMO-3  | -7.68483   | 38.17           | 40.94 | 20.89                     |
| HOMO-4  | -8.03858   | 62.42           | 1.97  | 35.61                     |

|                |          |       |       |       |
|----------------|----------|-------|-------|-------|
| <b>HOMO-5</b>  | -8.23477 | 25.44 | 23.31 | 51.25 |
| <b>HOMO-6</b>  | -8.24076 | 15.65 | 0.27  | 84.08 |
| <b>HOMO-7</b>  | -8.37247 | 13.80 | 6.15  | 80.05 |
| <b>HOMO-8</b>  | -8.42553 | 44.76 | 3.55  | 51.69 |
| <b>HOMO-9</b>  | -8.58308 | 34.19 | 4.68  | 61.13 |
| <b>HOMO-10</b> | -8.61955 | 22.75 | 0.49  | 76.76 |
| <b>HOMO-11</b> | -8.70200 | 0.99  | 0.22  | 98.79 |
| <b>HOMO-12</b> | -8.72349 | 32.88 | 0.59  | 66.53 |

**Table S3.** Atomic contributions to selected molecular orbitals of  $[\text{Au}_2\text{CuL}_2\text{Cl}_2]^+$  cation of **2** in the ground state ( $S_0$ ) geometry according Hirshfeld population analysis at CAM-B3LYP/ZORA-def2-TZVP//B3LYP-D4/ZORA-def2-TZVP level.

| MO             | Energy, eV | Contribution, % |       |       |                           |
|----------------|------------|-----------------|-------|-------|---------------------------|
|                |            | Cu              | Au    | Cl    | 2-(Ph <sub>2</sub> P)Phen |
| <b>LUMO+10</b> | -1.861     | 0.45            | 5.92  | 1.38  | 92.25                     |
| <b>LUMO+9</b>  | -1.99243   | 0.32            | 2.87  | 1.21  | 95.6                      |
| <b>LUMO+8</b>  | -2.11761   | 1.68            | 9.02  | 3.22  | 86.08                     |
| <b>LUMO+7</b>  | -2.21285   | 1.24            | 0.88  | 0.26  | 97.62                     |
| <b>LUMO+6</b>  | -2.29475   | 1.03            | 10.51 | 2.29  | 86.17                     |
| <b>LUMO+5</b>  | -2.347     | 0.83            | 2.61  | 0.40  | 96.16                     |
| <b>LUMO+4</b>  | -2.45449   | 2.04            | 3.11  | 0.46  | 94.39                     |
| <b>LUMO+3</b>  | -3.42594   | 1.02            | 1.17  | 0.47  | 97.34                     |
| <b>LUMO+2</b>  | -3.43029   | 1.12            | 0.40  | 0.21  | 98.27                     |
| <b>LUMO+1</b>  | -3.57098   | 2.07            | 1.15  | 0.56  | 96.22                     |
| <b>LUMO</b>    | -3.59248   | 3.47            | 1.58  | 0.86  | 94.09                     |
| <b>HOMO</b>    | -9.19861   | 64.98           | 5.50  | 1.03  | 28.49                     |
| <b>HOMO-1</b>  | -9.55426   | 29.44           | 16.96 | 3.52  | 50.08                     |
| <b>HOMO-2</b>  | -10.0174   | 22.39           | 27.57 | 19.53 | 30.51                     |
| <b>HOMO-3</b>  | -10.24     | 28.81           | 9.58  | 17.66 | 43.95                     |
| <b>HOMO-4</b>  | -10.3491   | 30.85           | 8.07  | 20.94 | 40.14                     |
| <b>HOMO-5</b>  | -10.4147   | 2.41            | 14.60 | 30.56 | 52.43                     |
| <b>HOMO-6</b>  | -10.4955   | 16.24           | 10.24 | 39.98 | 33.54                     |
| <b>HOMO-7</b>  | -10.5521   | 6.68            | 10.99 | 38.15 | 44.18                     |
| <b>HOMO-8</b>  | -10.5562   | 42.06           | 9.36  | 32.78 | 15.8                      |
| <b>HOMO-9</b>  | -10.5687   | 25.20           | 8.67  | 29.51 | 36.62                     |
| <b>HOMO-10</b> | -10.6386   | 5.83            | 7.95  | 3.86  | 82.36                     |
| <b>HOMO-11</b> | -10.674    | 4.50            | 1.88  | 6.50  | 87.12                     |
| <b>HOMO-12</b> | -10.723    | 19.53           | 5.48  | 13.00 | 61.99                     |

**Table S4.** Atomic contributions to selected molecular orbitals of  $[\text{CuAuL}_2]^{2+}$  cation of **3** in the ground state ( $S_0$ ) geometry according Hirshfeld population analysis at CAM-B3LYP/ZORA-def2-TZVP//B3LYP-D4/ZORA-def2-TZVP level.

| MO             | Energy, eV | Contribution, % |      |                           |
|----------------|------------|-----------------|------|---------------------------|
|                |            | Au              | Cu   | 2-(Ph <sub>2</sub> P)Phen |
| <b>LUMO+10</b> | -4.20283   | 9.92            | 2.38 | 87.7                      |
| <b>LUMO+9</b>  | -4.35386   | 12.99           | 1.96 | 85.05                     |
| <b>LUMO+8</b>  | -4.56719   | 1.48            | 0.89 | 97.63                     |
| <b>LUMO+7</b>  | -4.62815   | 15.36           | 0.54 | 84.1                      |
| <b>LUMO+6</b>  | -4.65373   | 2.40            | 0.80 | 96.8                      |

|                |          |       |       |       |
|----------------|----------|-------|-------|-------|
| <b>LUMO+5</b>  | -4.88203 | 12.91 | 0.76  | 86.33 |
| <b>LUMO+4</b>  | -5.08694 | 13.39 | 4.51  | 82.1  |
| <b>LUMO+3</b>  | -5.73484 | 2.14  | 1.08  | 96.78 |
| <b>LUMO+2</b>  | -5.76451 | 1.93  | 1.17  | 96.9  |
| <b>LUMO+1</b>  | -6.06846 | 1.67  | 3.22  | 95.11 |
| <b>LUMO</b>    | -6.08451 | 1.80  | 1.64  | 96.56 |
| <b>HOMO</b>    | -11.8087 | 6.61  | 64.63 | 28.76 |
| <b>HOMO-1</b>  | -12.1527 | 0.61  | 64.75 | 34.64 |
| <b>HOMO-2</b>  | -12.6099 | 9.53  | 27.71 | 62.76 |
| <b>HOMO-3</b>  | -12.7046 | 4.18  | 2.30  | 93.52 |
| <b>HOMO-4</b>  | -12.9516 | 1.20  | 26.96 | 71.84 |
| <b>HOMO-5</b>  | -12.9971 | 0.40  | 42.94 | 56.66 |
| <b>HOMO-6</b>  | -13.0964 | 0.53  | 53.59 | 45.88 |
| <b>HOMO-7</b>  | -13.1076 | 0.36  | 11.90 | 87.74 |
| <b>HOMO-8</b>  | -13.1122 | 0.11  | 0.15  | 99.74 |
| <b>HOMO-9</b>  | -13.2104 | 1.60  | 5.18  | 93.22 |
| <b>HOMO-10</b> | -13.2393 | 0.68  | 57.95 | 41.37 |
| <b>HOMO-11</b> | -13.3212 | 1.03  | 7.15  | 91.82 |
| <b>HOMO-12</b> | -13.3677 | 1.46  | 17.97 | 80.57 |
| <b>LUMO+10</b> | -4.20283 | 9.92  | 2.38  | 87.7  |

**Table S5.** Atomic contributions to selected molecular orbitals of  $[\text{Au}_2\text{AgL}_2\text{Cl}_2]^+$  cation of **4** in the ground state ( $S_0$ ) geometry according Hirshfeld population analysis at CAM-B3LYP/ZORA-def2-TZVP//B3LYP-D4/ZORA-def2-TZVP level.

| MO             | Energy, eV | Contribution, % |           |           |                                |
|----------------|------------|-----------------|-----------|-----------|--------------------------------|
|                |            | <b>Au</b>       | <b>Ag</b> | <b>Cl</b> | <b>2-(Ph<sub>2</sub>P)Phen</b> |
| <b>LUMO+10</b> | 0.27212    | 6.33            | 2.51      | 1.29      | 89.87                          |
| <b>LUMO+9</b>  | 0.09061    | 4.64            | 0.64      | 1.92      | 92.8                           |
| <b>LUMO+8</b>  | -0.01361   | 3.85            | 2.07      | 1.64      | 92.44                          |
| <b>LUMO+7</b>  | -0.07728   | 3.53            | 0.51      | 1.34      | 94.62                          |
| <b>LUMO+6</b>  | -0.15783   | 9.21            | 0.82      | 3.48      | 86.49                          |
| <b>LUMO+5</b>  | -0.21497   | 4.47            | 1.38      | 0.64      | 93.51                          |
| <b>LUMO+4</b>  | -0.60383   | 20.60           | 10.19     | 4.24      | 64.97                          |
| <b>LUMO+3</b>  | -1.09091   | 0.56            | 1.01      | 0.21      | 98.22                          |
| <b>LUMO+2</b>  | -1.09391   | 1.75            | 0.92      | 0.54      | 96.79                          |
| <b>LUMO+1</b>  | -1.26153   | 1.32            | 0.81      | 0.55      | 97.32                          |
| <b>LUMO</b>    | -1.35106   | 4.39            | 3.75      | 1.54      | 90.32                          |
| <b>HOMO</b>    | -8.03042   | 24.84           | 18.47     | 2.56      | 54.13                          |
| <b>HOMO-1</b>  | -8.14198   | 9.89            | 40.57     | 2.00      | 47.54                          |
| <b>HOMO-2</b>  | -8.18144   | 1.96            | 3.63      | 1.31      | 93.1                           |
| <b>HOMO-3</b>  | -8.27750   | 8.16            | 5.13      | 3.48      | 83.23                          |
| <b>HOMO-4</b>  | -8.55723   | 3.27            | 1.00      | 1.55      | 94.18                          |
| <b>HOMO-5</b>  | -8.59261   | 3.47            | 14.28     | 2.47      | 79.78                          |
| <b>HOMO-6</b>  | -8.71370   | 4.02            | 4.89      | 3.55      | 87.54                          |
| <b>HOMO-7</b>  | -8.76295   | 4.11            | 0.89      | 3.99      | 91.01                          |
| <b>HOMO-8</b>  | -8.84758   | 2.38            | 0.15      | 3.32      | 94.15                          |
| <b>HOMO-9</b>  | -8.85765   | 3.49            | 0.70      | 7.65      | 88.16                          |
| <b>HOMO-10</b> | -8.96296   | 2.64            | 0.58      | 4.84      | 91.94                          |
| <b>HOMO-11</b> | -8.96813   | 1.33            | 1.31      | 1.04      | 96.32                          |
| <b>HOMO-12</b> | -9.02391   | 5.01            | 0.41      | 7.73      | 86.85                          |

**Table S6.** Atomic contributions to selected molecular orbitals of  $[\text{AuAgL}_3]^{2+}$  cation of **5** in the ground state ( $S_0$ ) geometry according Hirshfeld population analysis at CAM-B3LYP/ZORA-def2-TZVP//B3LYP-D4/ZORA-def2-TZVP level.

| MO      | Energy, eV | Contribution, % |       |                           |
|---------|------------|-----------------|-------|---------------------------|
|         |            | Au              | Ag    | 2-(Ph <sub>2</sub> P)Phen |
| LUMO+10 | 0.09578    | 1.15            | 0.38  | 98.47                     |
| LUMO+9  | -0.05197   | 0.87            | 0.24  | 98.89                     |
| LUMO+8  | -0.05333   | 0.88            | 0.25  | 98.87                     |
| LUMO+7  | -0.17905   | 3.02            | 0.29  | 96.69                     |
| LUMO+6  | -0.56110   | 16.47           | 7.87  | 75.66                     |
| LUMO+5  | -0.93281   | 0.92            | 0.78  | 98.3                      |
| LUMO+4  | -1.00465   | 0.27            | 0.65  | 99.08                     |
| LUMO+3  | -1.00601   | 0.27            | 0.65  | 99.08                     |
| LUMO+2  | -1.11513   | 0.48            | 0.62  | 98.9                      |
| LUMO+1  | -1.11731   | 0.48            | 0.62  | 98.9                      |
| LUMO    | -1.12193   | 0.69            | 0.63  | 98.68                     |
| HOMO    | -7.46224   | 20.20           | 6.30  | 73.5                      |
| HOMO-1  | -7.46931   | 20.07           | 6.37  | 73.56                     |
| HOMO-2  | -7.87939   | 2.52            | 41.84 | 55.64                     |
| HOMO-3  | -7.88347   | 2.25            | 41.74 | 56.01                     |
| HOMO-4  | -8.13926   | 1.72            | 2.70  | 95.58                     |
| HOMO-5  | -8.18851   | 2.07            | 2.10  | 95.83                     |
| HOMO-6  | -8.18988   | 2.05            | 2.14  | 95.81                     |
| HOMO-7  | -8.42390   | 2.35            | 4.66  | 92.99                     |
| HOMO-8  | -8.53274   | 0.22            | 0.49  | 99.29                     |
| HOMO-9  | -8.53383   | 0.23            | 0.50  | 99.27                     |
| HOMO-10 | -8.65628   | 7.29            | 8.02  | 84.69                     |
| HOMO-11 | -8.77520   | 5.78            | 11.94 | 82.28                     |
| HOMO-12 | -8.78880   | 0.38            | 0.12  | 99.5                      |

**Table S7.** Metal...metal distances (Å) in **1–5**: the experimental data, and optimized  $S_0$  and  $T_1$  geometries.

|          |           | X-Ray derived values | B3LYP-D4/ZORA-def2-TZVP |                     |
|----------|-----------|----------------------|-------------------------|---------------------|
|          |           |                      | Ground state ( $S_0$ )  | Excited $T_1$ state |
| <b>1</b> | Cu3...Cu4 | 2.84                 | 2.81                    | 2.53                |
| <b>2</b> | Au1...Au2 | 3.49                 | 3.31                    | 3.42                |
|          | Au1...Cu1 | 3.28                 | 3.29                    | 2.92                |
|          | Au2...Cu1 | 3.28                 | 3.29                    | 2.92                |
| <b>3</b> | Au1...Cu1 | 2.87                 | 2.97                    | 2.74                |
| <b>4</b> | Au1...Au2 | 3.31                 | 3.22                    | 3.37                |
|          | Au1...Ag1 | 3.10                 | 3.17                    | 3.02                |
|          | Au1...Ag2 | 3.31                 | 3.17                    | 2.84                |
| <b>5</b> | Au1...Ag1 | 2.93                 | 2.98                    | 2.91                |

**Table S8.** Calculated  $\Delta E(T_1-S_0)$  energy gaps for the  $S_0$  and  $T_1$  state structures of **1–5** optimized at B3LYP-D4//ZORA-def2-TZVP level.

|                                                             | $\Delta E(T_1-S_0)$ , eV / nm | $\lambda_{\text{phos.}}$ nm (eV) <sup>[a]</sup> |
|-------------------------------------------------------------|-------------------------------|-------------------------------------------------|
| $[\text{Cu}_2\text{L}_2(\mu_2\text{-I})]^{2+}$ ( <b>1</b> ) | 1.665 / 745                   | 715 (1.734)                                     |
| $[\text{Au}_2\text{CuL}_2\text{Cl}_2]^+$ ( <b>2</b> )       | 1.367 / 907                   | –                                               |
| $[\text{CuAuL}_2]^{2+}$ ( <b>3</b> )                        | 1.761 / 704                   | 720 (1.722)                                     |
| $[\text{Au}_2\text{AgL}_2\text{Cl}_2]^+$ ( <b>4</b> )       | 2.301 / 539                   | 600 (2.066)                                     |
| $[\text{AuAgL}_3]^{2+}$ ( <b>5</b> )                        | 2.206 / 562                   | 605 (2.049)                                     |

<sup>[a]</sup> Band maxima in the phosphorescence spectra of **1** and **3–5** (**2** is non-emissive).

## §7.4. Electronic absorption spectra: experimental and theoretical data

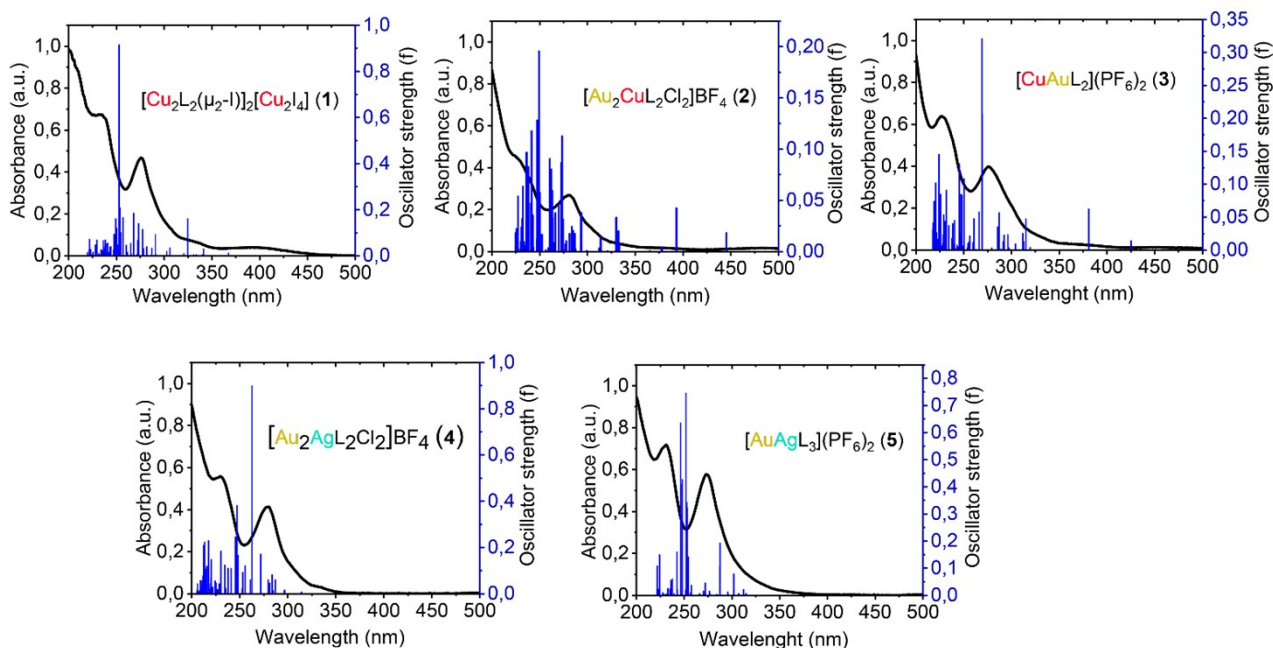

**Figure S33.** Experimental electronic absorption spectra (solid black curves) of **1–5** (MeCN, 298 K) and electronic transitions (vertical bars) calculated for the  $[\text{Cu}_2\text{L}_2(\mu_2\text{-I})]^{2+}$ ,  $[\text{Au}_2\text{CuL}_2\text{Cl}_2]^+$ ,  $[\text{CuAuL}_2]^{2+}$ ,  $[\text{Au}_2\text{AgL}_2\text{Cl}_2]^+$  and  $[\text{AuAgL}_3]^{2+}$  cations, respectively **5** calculated at CAM-B3LYP/def2-TZVP//B3LYP-D4/ZORA-def2-TZVP level.

**Table S9.** Calculated (energies and characters of the main singlet excitations ( $f > 0.01$ )) of  $[\text{Cu}_2\text{L}_2(\mu_2\text{-I})]^{2+}$  cation of **1**.

| state | E, eV | $\lambda$ , nm | $f$   | Transitions (main contributions)                                                                                             | Character         |
|-------|-------|----------------|-------|------------------------------------------------------------------------------------------------------------------------------|-------------------|
| 7     | 3.818 | 324.7          | 0.163 | HOMO -> LUMO+1 (56%)<br>HOMO-2 -> LUMO+3 (12%)<br>HOMO-2 -> LUMO+2 (10%)                                                     | (CuI)LCT          |
| 19    | 4.471 | 277.3          | 0.119 | HOMO-8 -> LUMO+1 (9%)<br>HOMO-7 -> LUMO+2 (12%)<br>HOMO-6 -> LUMO+4 (10%)<br>HOMO-3 -> LUMO+3 (8%)<br>HOMO-1 -> LUMO+4 (10%) | (CuI)LCT + (L)LCT |
| 20    | 4.538 | 273.2          | 0.142 | HOMO-4 -> LUMO+1 (22%)<br>HOMO-3 -> LUMO+3 (25%)                                                                             | (CuI)LCT + (L)LCT |
| 24    | 4.626 | 268            | 0.182 | HOMO-8 -> LUMO+1 (14%)<br>HOMO-4 -> LUMO+1 (14%)<br>HOMO-3 -> LUMO+2 (11%)                                                   | (CuI)LCT + (L)LCT |

|    |       |       |       |                                                                                                  |                   |
|----|-------|-------|-------|--------------------------------------------------------------------------------------------------|-------------------|
| 31 | 4.828 | 256.8 | 0.167 | HOMO-2 -> LUMO+5 (34%)<br>HOMO-2 -> LUMO+20 (7%)<br>HOMO -> LUMO+10 (8%)                         | (CuI)LCT + (L)LCT |
| 33 | 4.889 | 253.6 | 0.210 | HOMO-8 -> LUMO+1 (7%)<br>HOMO-3 -> LUMO+3 (10%)<br>HOMO -> LUMO+10 (16%)                         | (CuI)LCT + (L)LCT |
| 35 | 4.902 | 252.9 | 0.913 | HOMO-10 -> LUMO+1 (26%)<br>HOMO-8 -> LUMO+1 (12%)                                                | (CuI)LCT + (L)LCT |
| 37 | 4.951 | 250.4 | 0.118 | HOMO-2 -> LUMO+6 (11%)<br>HOMO-1 -> LUMO+7 (9%)<br>HOMO -> LUMO+10 (21%)                         | (CuI)LCT + (L)LCT |
| 38 | 4.975 | 249.2 | 0.161 | HOMO-9 -> LUMO+2 (7%)<br>HOMO-4 -> LUMO+4 (21%)<br>HOMO-3 -> LUMO+3 (7%)<br>HOMO -> LUMO+10 (7%) | (CuI)LCT + (L)LCT |

**Table S10.** Calculated energies and characters of the main singlet excitations ( $f > 0.01$ ) of  $[\text{Au}_2\text{CuL}_2\text{Cl}_2]^+$  cation of **2**.

| state | E, eV    | $\lambda$ , nm | $f$      | Transitions (main contributions)                                                                 | Character             |
|-------|----------|----------------|----------|--------------------------------------------------------------------------------------------------|-----------------------|
| 1     | 2.822    | 445.3          | 0.018    | HOMO-1 -> LUMO (5%)<br>HOMO -> LUMO+1 (7%)<br>HOMO -> LUMO+2 (13%)                               | (Au+Cu)LCT+ (L)LCT    |
| 3     | 3.278875 | 393.1          | 0.042321 | HOMO-2 -> LUMO (5%)<br>HOMO-1 -> LUMO (7%)<br>HOMO -> LUMO+1 (10%)                               | (Au+Cu+Cl)LCT+ (L)LCT |
| 9     | 3.862    | 330.1          | 0.033    | HOMO-6 -> LUMO (10%)<br>HOMO-4 -> LUMO (31%)<br>HOMO-2 -> LUMO (27%)                             | (Au+Cu+Cl)LCT+ (L)LCT |
| 3     | 3.279    | 393.1          | 0.042    | HOMO-3 -> LUMO+1 (5%)<br>HOMO-3 -> LUMO+2 (8%)                                                   | (Au+Cu+Cl)LCT+ (L)LCT |
| 15    | 4.232    | 293.3          | 0.038    | HOMO-14 -> LUMO+1 (16%)<br>HOMO-14 -> LUMO+2 (7%)<br>HOMO-4 -> LUMO (7%)<br>HOMO-2 -> LUMO (10%) | (Au+Cu+Cl)LCT+ (L)LCT |
| 26    | 4.549    | 273.5          | 0.112    | HOMO-7 -> LUMO (14%)<br>HOMO-3 -> LUMO+1 (9%)<br>HOMO-3 -> LUMO+2 (14%)                          | (Au+Cu+Cl)LCT+ (L)LCT |
| 9     | 3.862    | 330.1          | 0.033    | HOMO-12 -> LUMO+2 (11%)<br>HOMO-6 -> LUMO+3 (9%)<br>HOMO-5 -> LUMO+1 (11%)                       | (Au+Cu+Cl)LCT+ (L)LCT |
| 49    | 5.154    | 241.4          | 0.118    | HOMO-1 -> LUMO+5 (55%)                                                                           | (Au+Cu)LCT+ (L)LCT    |
| 54    | 5.252    | 236.2          | 0.097    | HOMO-2 -> LUMO+6 (18%)<br>HOMO -> LUMO+9 (20%)                                                   | (Au+Cu)LCT+ (L)LCT    |

**Table S11.** Calculated energies and characters of the main singlet excitations ( $f > 0.01$ ) of  $[\text{CuAuL}_2]^{2+}$  cation of **3**.

| state | E, eV | $\lambda$ , nm | $f$   | Transitions (main contributions) | Character          |
|-------|-------|----------------|-------|----------------------------------|--------------------|
| 1     | 2.916 | 425.1          | 0.014 | HOMO-1 -> LUMO+1 (10%)           | (Au+Cu)LCT+ (L)LCT |

|    |       |       |       |                                                                             |                    |
|----|-------|-------|-------|-----------------------------------------------------------------------------|--------------------|
|    |       |       |       | HOMO -> LUMO (74%)                                                          |                    |
| 3  | 3.255 | 380.9 | 0.062 | HOMO-1 -> LUMO+1 (72%)<br>HOMO -> LUMO (13%)                                | (Au+Cu)LCT+ (L)LCT |
| 10 | 3.937 | 315   | 0.047 | HOMO-2 -> LUMO (39%)<br>HOMO-1 -> LUMO+3 (22%)                              | (Au+Cu)LCT+ (L)LCT |
| 11 | 3.962 | 312.9 | 0.013 | HOMO-6 -> LUMO+1 (39%)<br>HOMO-4 -> LUMO+1 (30%)                            | (Cu)LCT+ (L)LCT    |
| 12 | 3.974 | 312   | 0.025 | HOMO-5 -> LUMO+1 (31%)<br>HOMO -> LUMO+4 (30%)                              | (Au+Cu)LCT+ (L)LCT |
| 13 | 4.076 | 304.2 | 0.010 | HOMO-6 -> LUMO (24%)<br>HOMO-4 -> LUMO (13%)<br>HOMO -> LUMO+4 (14%)        | (Au+Cu)LCT+(L)LCT  |
| 19 | 4.320 | 287   | 0.057 | HOMO-10 -> LUMO (14%)<br>HOMO-2 -> LUMO+2 (27%)<br>HOMO -> LUMO+5 (12%)     | (Au+Cu)LCT+(L)LCT  |
| 20 | 4.342 | 285.6 | 0.035 | HOMO-3 -> LUMO+2 (15%)<br>HOMO-2 -> LUMO+3 (26%)                            | (Au+Cu)LCT+(L)LCT  |
| 22 | 4.603 | 269.3 | 0.205 | HOMO-3 -> LUMO+1 (14%)<br>HOMO-2 -> LUMO+2 (18%)                            | (Au+Cu)LCT+(L)LCT  |
| 23 | 4.608 | 269   | 0.321 | HOMO-6 -> LUMO+2 (10%)<br>HOMO-3 -> LUMO (21%)<br>HOMO-2 -> LUMO+3 (10%)    | (Au+Cu)LCT+(L)LCT  |
| 34 | 4.953 | 250.3 | 0.108 | HOMO-11 -> LUMO (10%)<br>HOMO-9 -> LUMO+1 (10%)                             | (Au+Cu)LCT+(L)LCT  |
| 39 | 5.057 | 245.2 | 0.131 | HOMO-11 -> LUMO+1 (10%)<br>HOMO-6 -> LUMO+4 (22%)<br>HOMO-4 -> LUMO+4 (16%) | (Au+Cu)LCT+(L)LCT  |
| 65 | 5.530 | 224.2 | 0.145 | HOMO-3 -> LUMO+3 (12%)<br>HOMO-2 -> LUMO+5 (10%)                            | (Au+Cu)LCT+(L)LCT  |

**Table S12.** Calculated energies and characters of the main singlet excitations ( $f > 0.01$ ) of  $[\text{Au}_2\text{AgL}_2\text{Cl}_2]^+$  cation of **4**.

| state | E, eV | $\lambda$ , nm | $f$   | Transitions (main contributions)                                         | Character              |
|-------|-------|----------------|-------|--------------------------------------------------------------------------|------------------------|
| 1     | 3.945 | 314.3          | 0.007 | HOMO-1 -> LUMO (72%)                                                     | (Au+Ag+Cl)LCT + (L)LCT |
| 4     | 4.185 | 296.3          | 0.013 | HOMO-3 -> LUMO+1 (11%)<br>HOMO-3 -> LUMO+3 (11%)<br>HOMO-2 -> LUMO (36%) | (Au+Ag+Cl)LCT + (L)LCT |
| 5     | 4.321 | 286.9          | 0.060 | HOMO-3 -> LUMO (10%)<br>HOMO-1 -> LUMO+1 (27%)<br>HOMO -> LUMO (16%)     | (Au+Ag+Cl)LCT + (L)LCT |
| 10    | 4.561 | 271.9          | 0.171 | HOMO-1 -> LUMO+2 (9%)<br>HOMO-1 -> LUMO+4 (22%)<br>HOMO -> LUMO+1 (37%)  | (Au+Ag+Cl)LCT + (L)LCT |
| 11    | 4.718 | 262.8          | 0.276 | HOMO-5 -> LUMO+1 (13%)<br>HOMO-4 -> LUMO (20%)                           | (Au+Ag+Cl)LCT + (L)LCT |
| 12    | 4.718 | 262.8          | 0.899 | HOMO-5 -> LUMO (20%)<br>HOMO-4 -> LUMO+1 (11%)<br>HOMO-4 -> LUMO+3 (8%)  | (Au+Ag+Cl)LCT + (L)LCT |
| 14    | 4.854 | 255.4          | 0.122 | HOMO-5 -> LUMO (11%)<br>HOMO-3 -> LUMO+4 (7%)<br>HOMO -> LUMO (8%)       | (Au+Ag+Cl)LCT + (L)LCT |
| 17    | 4.997 | 248.1          | 0.166 | HOMO-4 -> LUMO+2 (10%)                                                   | (Au+Ag+Cl)LCT + (L)LCT |



|    |       |       |       |                                                                                                                           |                        |
|----|-------|-------|-------|---------------------------------------------------------------------------------------------------------------------------|------------------------|
|    |       |       |       | HOMO-2 -> LUMO (10%)<br>HOMO-2 -> LUMO+2 (10%)                                                                            |                        |
| 18 | 5.020 | 247.0 | 0.382 | HOMO-5 -> LUMO+2 (17%)<br>HOMO-4 -> LUMO+3 (12%)<br>HOMO-1 -> LUMO+3 (8%)                                                 | (Au+Ag+Cl)LCT + (L)LCT |
| 19 | 5.053 | 245.4 | 0.246 | HOMO-14 -> LUMO (6%)<br>HOMO-6 -> LUMO (25%)<br>HOMO-5 -> LUMO (6%)<br>HOMO-5 -> LUMO+4 (9%)                              | (Au+Ag+Cl)LCT + (L)LCT |
| 25 | 5.291 | 234.3 | 0.124 | HOMO-15 -> LUMO (11%)<br>HOMO -> LUMO+6 (8%)                                                                              | (Au+Ag+Cl)LCT + (L)LCT |
| 27 | 5.379 | 230.5 | 0.185 | HOMO-7 -> LUMO+4 (5%)<br>HOMO -> LUMO+5 (9%)                                                                              | (Au+Ag+Cl)LCT + (L)LCT |
| 28 | 5.381 | 230.4 | 0.077 | HOMO-16 -> LUMO (20%)<br>HOMO-16 -> LUMO+4 (9%)<br>HOMO-14 -> LUMO (9%)                                                   | (Au+Ag+Cl)LCT + (L)LCT |
| 44 | 5.706 | 217.3 | 0.230 | HOMO-15 -> LUMO+1 (6%)<br>HOMO-11 -> LUMO (7%)<br>HOMO-8 -> LUMO+1 (6%)<br>HOMO-6 -> LUMO+2 (5%)<br>HOMO-3 -> LUMO+8 (5%) | (Au+Ag+Cl)LCT + (L)LCT |
| 53 | 5.807 | 213.5 | 0.224 | HOMO-15 -> LUMO+1 (5%)<br>HOMO-1 -> LUMO+5 (5%)                                                                           | (Au+Ag+Cl)LCT + (L)LCT |

**Table S13.** Calculated energies and characters of the main singlet excitations ( $f > 0.01$ ) of  $[\text{AuAgL}_3]^{2+}$  cation of **5**.

| State | E, eV | $\lambda$ , nm | $f$   | Transitions (main contributions)                                                                                                                                                                     | Character          |
|-------|-------|----------------|-------|------------------------------------------------------------------------------------------------------------------------------------------------------------------------------------------------------|--------------------|
| 1     | 3.942 | 314.5          | 0.007 | HOMO-2 -> LUMO (11%)<br>HOMO-2 -> LUMO+5 (5%)<br>HOMO-1 -> LUMO+2 (5%)<br>HOMO -> LUMO (21%)<br>HOMO -> LUMO+6 (9%)                                                                                  | (Au+Ag)LCT+ (L)LCT |
| 3     | 3.972 | 312.2          | 0.021 | HOMO-3 -> LUMO+1 (12%)<br>HOMO-3 -> LUMO+3 (10%)<br>HOMO-2 -> LUMO+2 (11%)<br>HOMO-2 -> LUMO+4 (10%)<br>HOMO-1 -> LUMO+1 (7%)<br>HOMO-1 -> LUMO+2 (6%)<br>HOMO -> LUMO+1 (5%)<br>HOMO -> LUMO+2 (6%) | (Au+Ag)LCT+ (L)LCT |
| 8     | 4.110 | 301.6          | 0.011 | HOMO-4 -> LUMO+2 (8%)<br>HOMO-2 -> LUMO+5 (9%)<br>HOMO-1 -> LUMO (8%)<br>HOMO-1 -> LUMO+1 (8%)<br>HOMO-1 -> LUMO+6 (11%)                                                                             | (Au+Ag)LCT+ (L)LCT |
| 12    | 4.311 | 287.6          | 0.193 | HOMO-6 -> LUMO+3 (12%)<br>HOMO-5 -> LUMO+4 (5%)<br>HOMO-4 -> LUMO+5 (9%)<br>HOMO-1 -> LUMO+4 (7%)<br>HOMO -> LUMO+1 (5%)<br>HOMO -> LUMO+3 (17%)                                                     | (Au+Ag)LCT+ (L)LCT |
| 13    | 4.314 | 287.4          | 0.105 | HOMO-6 -> LUMO+5 (8%)                                                                                                                                                                                | (Au+Ag)LCT(L)LCT   |

|    |       |       |       |                                                                                                                                                                                                 |                     |
|----|-------|-------|-------|-------------------------------------------------------------------------------------------------------------------------------------------------------------------------------------------------|---------------------|
|    |       |       |       | HOMO-5 -> LUMO+4 (5%)<br>HOMO-4 -> LUMO+3 (12%)<br>HOMO-1 -> LUMO+4 (9%)<br>HOMO -> LUMO+5 (6%)                                                                                                 |                     |
| 21 | 4.558 | 272   | 0.043 | HOMO-3 -> LUMO+4 (5%)<br>HOMO-2 -> LUMO+1 (5%)<br>HOMO-2 -> LUMO+3 (10%)<br>HOMO-2 -> LUMO+6 (7%)<br>HOMO-1 -> LUMO (7%)<br>HOMO-1 -> LUMO+1 (7%)<br>HOMO -> LUMO+2 (6%)<br>HOMO -> LUMO+3 (5%) | (Au+Ag)LCT+(L)LCT   |
| 22 | 4.559 | 272   | 0.040 | HOMO-3 -> LUMO+6 (17%)<br>HOMO-1 -> LUMO (5%)<br>HOMO -> LUMO (7%)<br>HOMO -> LUMO+2 (9%)                                                                                                       | (Au+Ag)LCT+(L)LCT   |
| 33 | 4.901 | 253   | 0.323 | HOMO-7 -> LUMO+3 (7%)<br>HOMO-6 -> LUMO (5%)<br>HOMO-1 -> LUMO+3 (5%)<br>HOMO -> LUMO+7 (6%)                                                                                                    | (Au+Ag)LCT+(L)LCT   |
| 34 | 4.902 | 252.9 | 0.343 | HOMO-8 -> LUMO (5%)<br>HOMO-7 -> LUMO+4 (7%)<br>HOMO-1 -> LUMO+4 (5%)<br>HOMO-1 -> LUMO+7 (5%)                                                                                                  | (Au+Ag)LCT+(L)LCT   |
| 35 | 4.922 | 251.9 | 0.746 | HOMO-6 -> LUMO+3 (6%)<br>HOMO-5 -> LUMO+4 (6%)<br>HOMO-4 -> LUMO (7%)                                                                                                                           | (Au+Ag)LCT + (L)LCT |
| 38 | 5.002 | 247.9 | 0.427 | HOMO-7 -> LUMO+3 (3%)<br>HOMO -> LUMO+5 (3%)<br>HOMO -> LUMO+7 (43%)<br>HOMO -> LUMO+12 (3%)                                                                                                    | (Au+Ag)LCT + (L)LCT |
| 40 | 5.036 | 246.2 | 0.635 | HOMO-16 -> LUMO+6 (5%)<br>HOMO-11 -> LUMO+6 (6%)<br>HOMO-10 -> LUMO+6 (10%)<br>HOMO-7 -> LUMO+6 (5%)<br>HOMO-4 -> LUMO+6 (5%)                                                                   | (Au+Ag)LCT + (L)LCT |
| 66 | 5.532 | 224.1 | 0.146 | HOMO-7 -> LUMO+3 (5%)<br>HOMO-6 -> LUMO+6 (7%)<br>HOMO-4 -> LUMO+3 (14%)<br>HOMO -> LUMO+12 (8%)                                                                                                | (Au+Ag)LCT + (L)LCT |
| 67 | 5.533 | 224.1 | 0.149 | HOMO-7 -> LUMO+4 (5%)<br>HOMO-5 -> LUMO+6 (7%)<br>HOMO-4 -> LUMO+4 (14%)                                                                                                                        | (Au+Ag)LCT + (L)LCT |

## §8. Details of cytotoxic activity study

Cytotoxic activity study of the ligand L and clusters 1–5 was performed on hepatocellular carcinoma HepG2, laryngeal carcinoma Hep2, lung carcinoma A549 and non-tumor lung fibroblasts MRC5 human cell lines. All

cell lines except A549 cell line (BioloT Ltd., Russia) were purchased from the State Research Center of Virology and Biotechnology VECTOR (Novosibirsk, Russia). Cell viability was assessed by double staining with fluorescent dyes Hoechst 33342/propidium iodide (PI) according to the standard method.<sup>17</sup>

Cells were seeded on a 96-well plate (Jet Biofil, TCP011096) with a seeding cells density of  $2 \times 10^4/\text{cm}^2$  and cultured in medium (DMEM for HepG2, Hep2 and MRC5 cells and DMEM/F12 for A549 cells) containing 10% fetal bovine serum (FBS, HyClone) and GlutaMAX supplement (Gibco, 35050061) for 24 h under standard conditions (humidified atmosphere, 5% CO<sub>2</sub>, 37 °C). Ligand **1** (1–32 μM in DMSO) and tested complexes **1–5** (0.5–16 μM in DMSO) were then added and incubated for 24 h, the final concentration of DMSO < 1% (v/v). After incubation, cells were stained with a mixture of Hoechst 33342 (Sigma-Aldrich) and PI (Invitrogen) fluorescent dyes for 30 min at 37 °C. Images were then acquired (4 fields per well, 200× magnification) using an IN Cell Analyzer 2200 imaging system (GEHealthcare, UK) and analyzed using IN Cell Investigator software (version 1.5, GEHealthcare, UK) to identify dead, live and apoptotic cells in the whole population. Cytotoxic activity was assessed using the IC<sub>50</sub> parameters calculated from cell survival (%) versus drug concentration (μM) plots. Selectivity indices (SI) were determined as the ratio of the IC<sub>50</sub> on the MRC5 line to its values on tumor cell lines. All data presented are the mean of three wells. Quantitative data are expressed as mean ± standard deviation (SD).

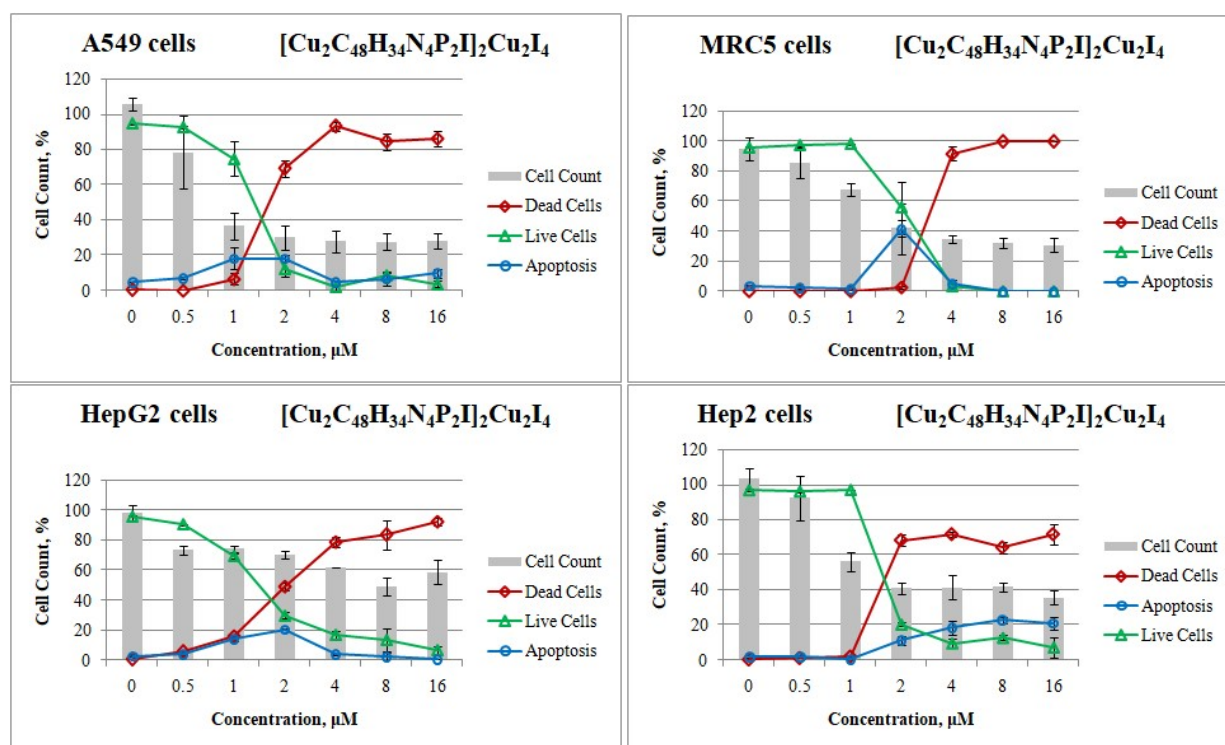

**Figure S34.** The effect of **1** on the viability of A549, MRC5, HepG2 and Hep2 cells determined after 24 h by Hoechst 33342/propidium iodide staining.

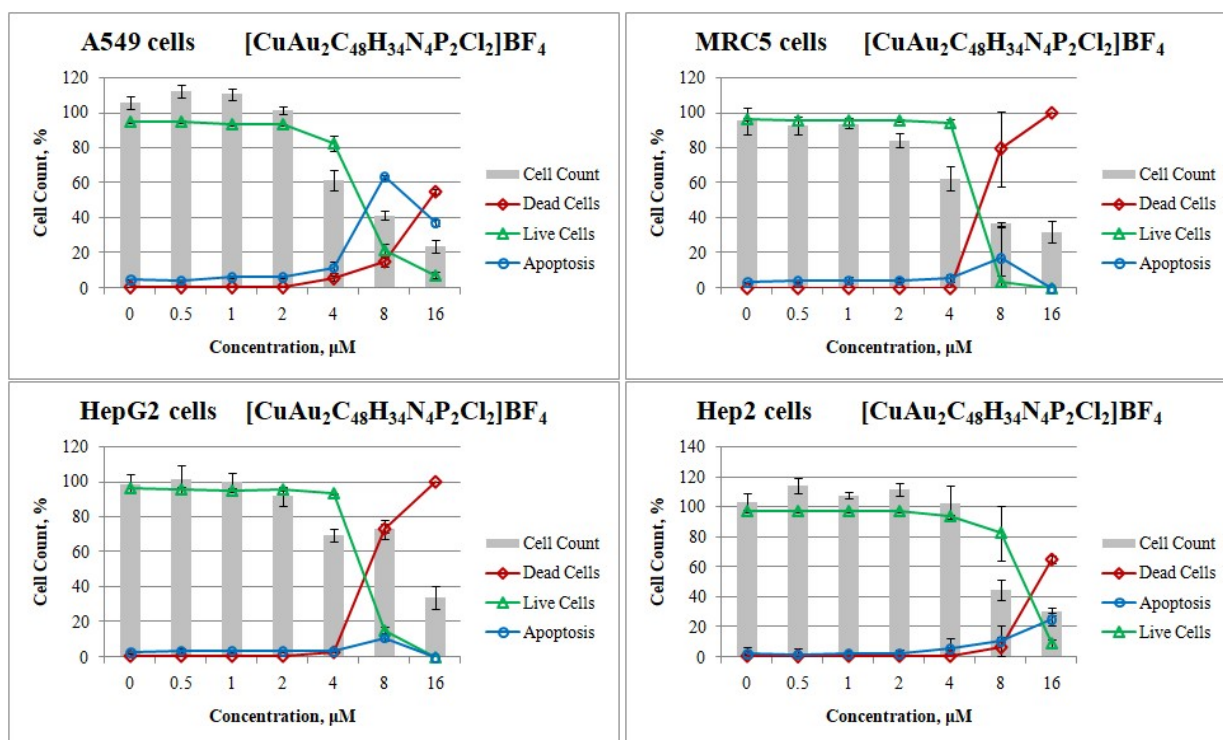

**Figure S35.** The effect of complex 2 on the viability of A549, MRC5, HepG2 and Hep2 cells determined after 24 h by Hoechst 33342/propidium iodide staining.

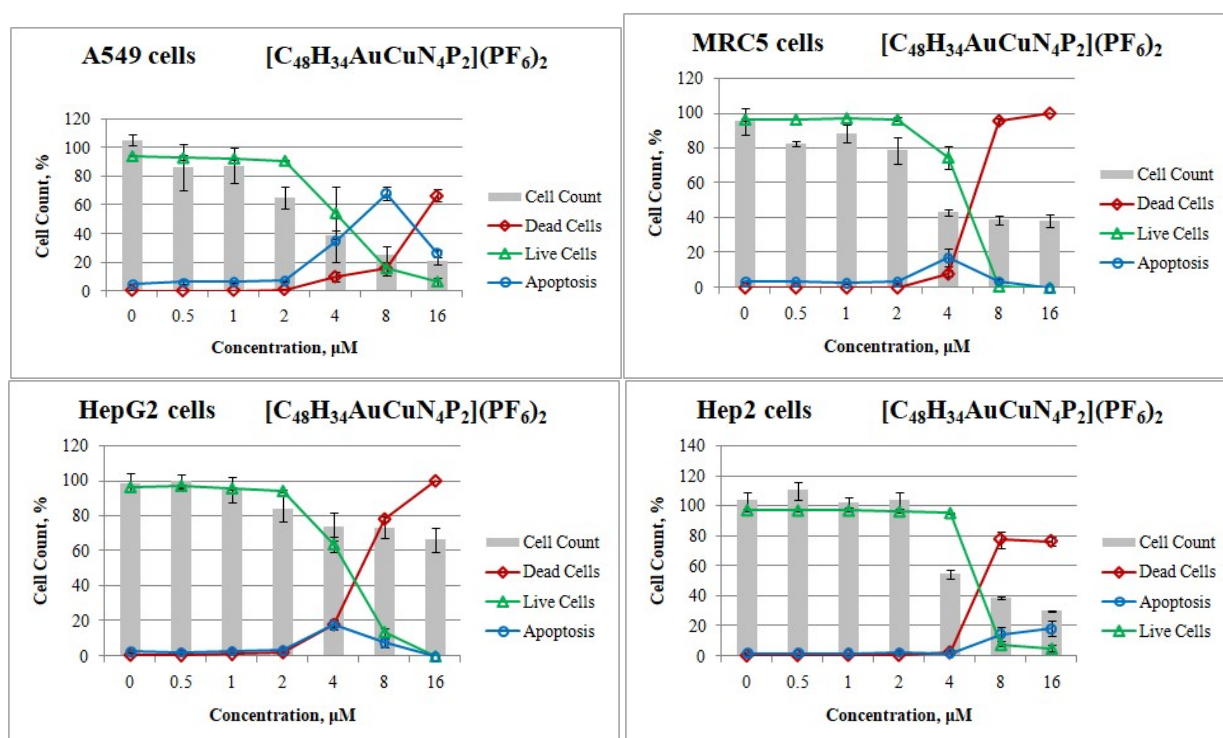

**Figure S36.** The effect of complex 3 on the viability of A549, MRC5, HepG2 and Hep2 cells determined after 24 h by Hoechst 33342/propidium iodide staining.

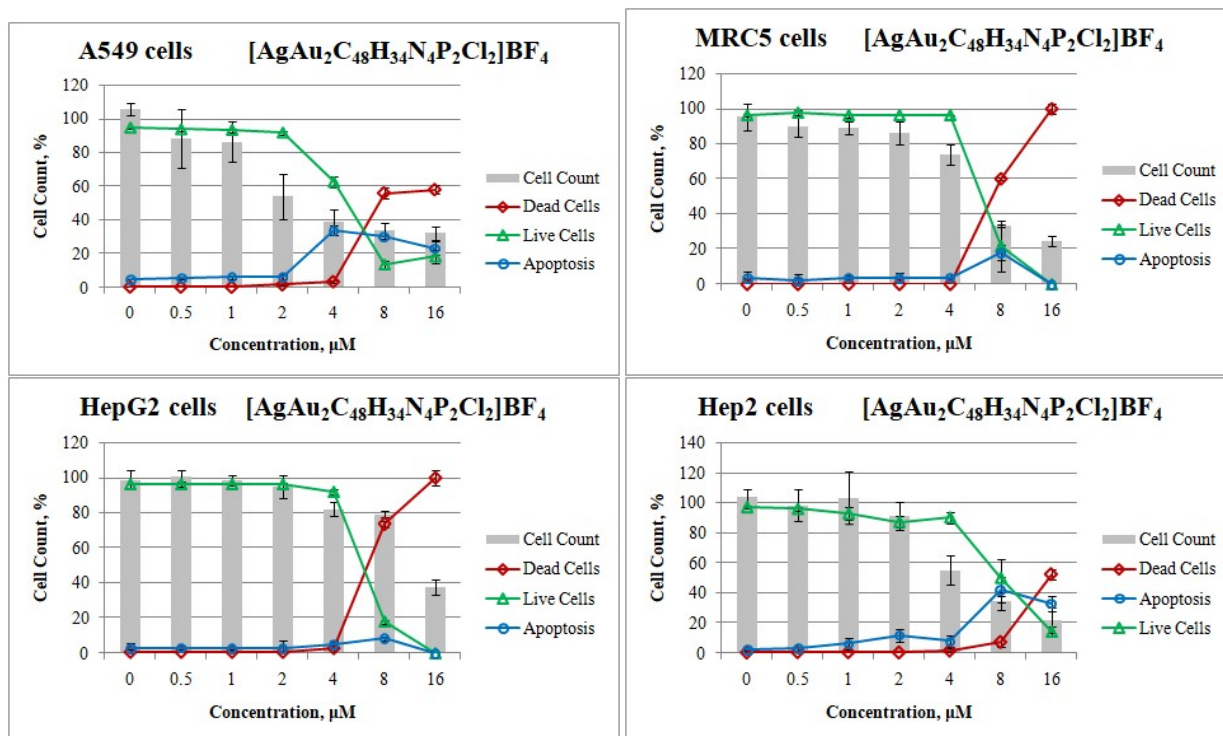

**Figure S37.** The effect of complex 4 on the viability of A549, MRC5, HepG2 and Hep2 cells determined after 24 h by Hoechst 33342/propidium iodide staining.

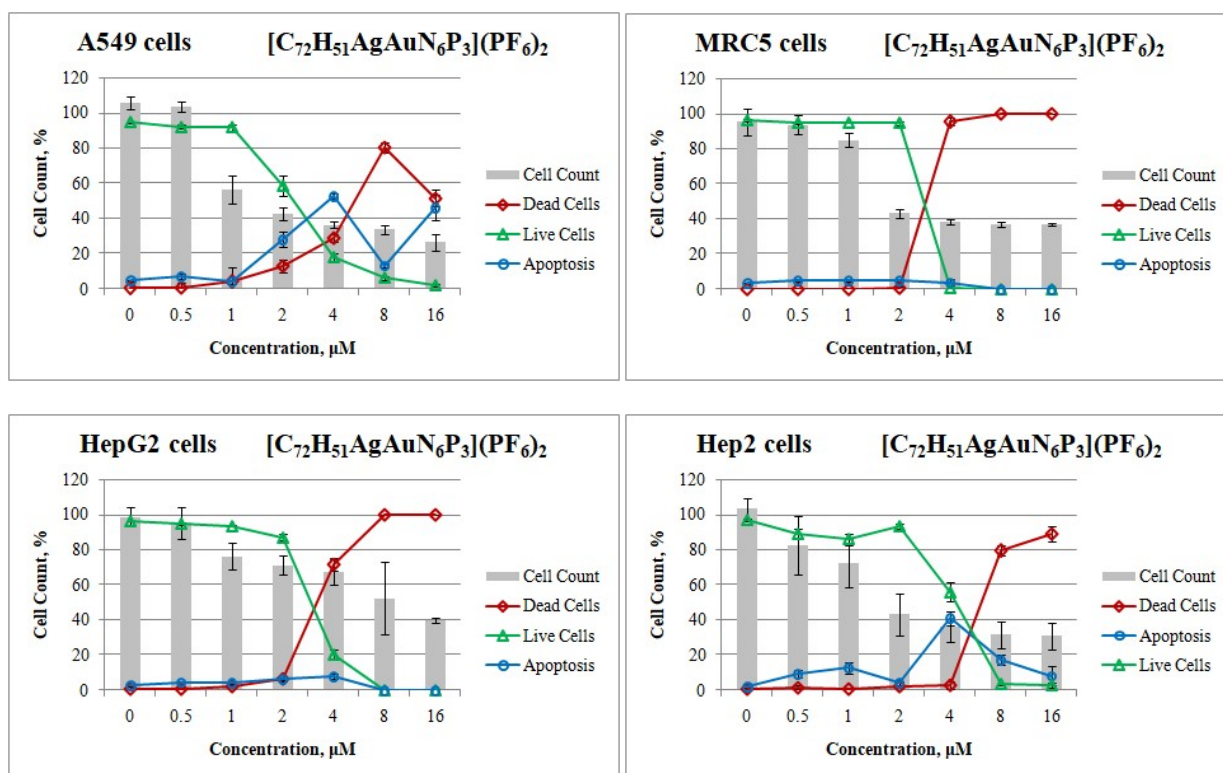

**Figure S38.** The effect of complex 5 on the viability of A549, MRC5, HepG2 and Hep2 cells determined after 24 h by Hoechst 33342/propidium iodide staining.

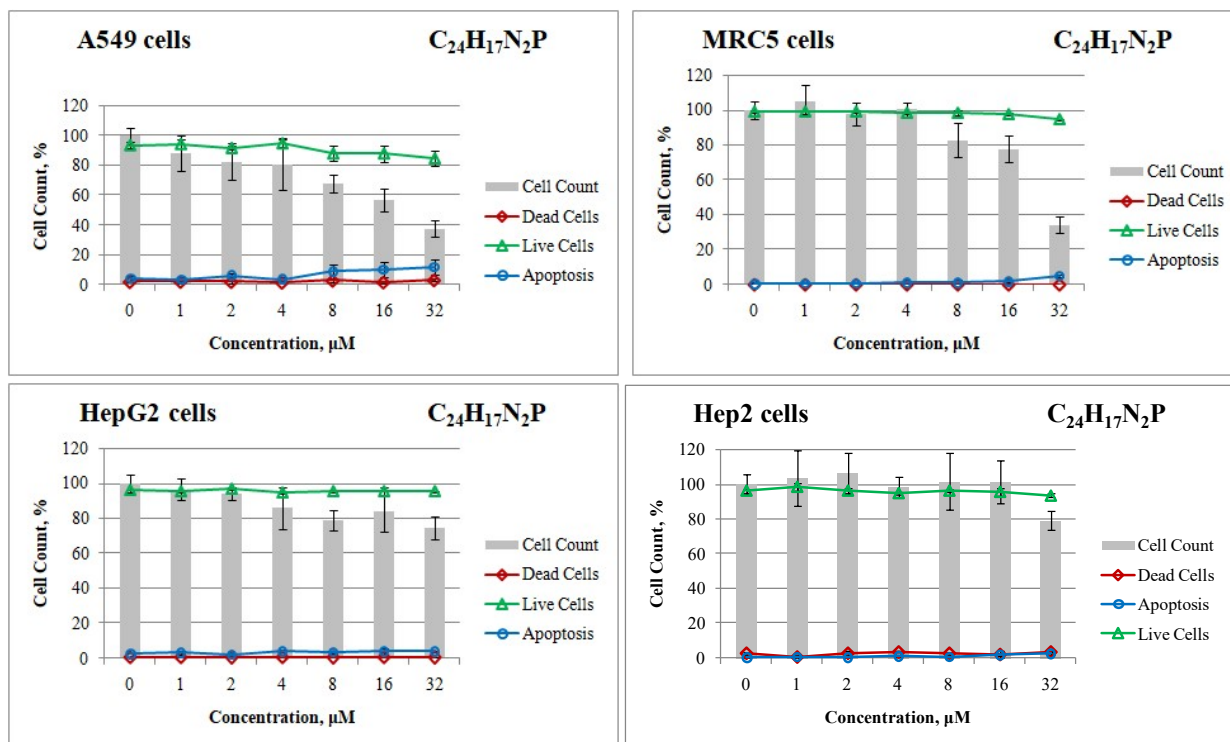

**Figure S39.** The effect of L on the viability of A549, MRC5, HepG2 and Hep2 cells determined after 24 h by Hoechst 33342/propidium iodide staining.

## §9. References

1. R. Uson, A. Laguna, M. Laguna, D. A. Briggs, H. H. Murray and J. P. Fackler Jr., in *Inorg. Synth.*, 1989, 85–91.
2. *SADABS, v. 2008-1*, Bruker AXS, Madison, WI, USA, 2008.
3. G. Sheldrick, *Acta Crystallogr. A*, 2015, **71**, 3–8.
4. G. Sheldrick, *Acta Crystallogr. C*, 2015, **71**, 3–8.
5. D. A. Pantazis, X. Y. Chen, C. R. Landis and F. Neese, *J. Chem. Theory Comput.*, 2008, **4**, 908–919.
6. C. van Wüllen, *J. Chem. Phys.*, 1998, **109**, 392–399.
7. E. v. Lenthe, E. J. Baerends and J. G. Snijders, *J. Chem. Phys.*, 1993, **99**, 4597–4610.
8. R. F. W. Bader and R. F. Bader, *Atoms in Molecules: A Quantum Theory*, Clarendon Press, 1990.
9. T. Lu, *J. Chem. Phys.*, 2024, **161**, 082503.
10. A. D. Becke, *J. Chem. Phys.*, 1993, **98**, 1372–1377.
11. E. Caldeweyher, S. Ehlert, A. Hansen, H. Neugebauer, S. Spicher, C. Bannwarth and S. Grimme, *J. Chem. Phys.*, 2019, **150**, 154122.
12. T. Yanai, D. P. Tew and N. C. Handy, *Chem. Phys. Lett.*, 2004, **393**, 51–57.
13. F. Weigend and R. Ahlrichs, *Phys. Chem. Chem. Phys.*, 2005, **7**, 3297–3305.
14. F. Neese, F. Wennmohs, U. Becker and C. Riplinger, *J. Chem. Phys.*, 2020, **152**, 224108.
15. S. Hirata and M. Head-Gordon, *Chem. Phys. Lett.*, 1999, **314**, 291–299.
16. J. Tomasi and M. Persico, *Chem. Rev.*, 1994, **94**, 2027–2094.
17. Y.-J. Lee and E. Shacter, *J. Biol. Chem.*, 1999, **274**, 19792–19798.
